# Supplementary material for: Simulated Changes in Seasonal and Low Flows with Climate Change for Irish Catchments
Source: MDPI journal article supplement (doi:10.3390/w14101556), 2022-05-12
Supplement: s1 [file s1]

## Supplementary Information

**Table S1 List of 37 catchments with their drainage area, mean daily discharge (Qmean), mean daily precipitation (Pmean) and discharge to precipitation ratio (Q-to-P ratio) for the period 1976-2005.**

| Code  | Station         | Waterbody  | Lat    | Lon    | Area<br>[km <sup>2</sup> ] | Qmean<br>[m <sup>3</sup> /s] | Pmean<br>[mm] | Q-to-P<br>ratio |
|-------|-----------------|------------|--------|--------|----------------------------|------------------------------|---------------|-----------------|
| 6013  | Charleville     | Dee        | 53.856 | -6.414 | 309                        | 4.29                         | 2.42          | 0.50            |
| 6014  | Tallanstown     | Glyde      | 53.921 | -6.55  | 270                        | 4.40                         | 2.52          | 0.56            |
| 7009  | Navan Weir      | Boyne      | 53.644 | -6.672 | 1658                       | 24.54                        | 2.44          | 0.52            |
| 7012  | Slane Castle    | Boyne      | 53.707 | -6.562 | 2408                       | 38.80                        | 2.49          | 0.56            |
| 12001 | Scarrawalsh     | Slaney     | 52.549 | -6.55  | 1031                       | 21.22                        | 3.00          | 0.59            |
| 14007 | Derrybrock      | Stradbally | 53.039 | -7.085 | 115                        | 1.57                         | 2.50          | 0.47            |
| 15003 | Dinin<br>Bridge | Dinin      | 52.715 | -7.292 | 140                        | 5.77                         | 2.81          | 1.27            |
| 15006 | Brownsbarn      | Nore       | 52.501 | -7.092 | 2418                       | 40.70                        | 2.68          | 0.54            |
| 15007 | Kilbricken      | Nore       | 52.959 | -7.462 | 340                        | 7.50                         | 3.11          | 0.61            |
| 16008 | New Bridge      | Suir       | 52.459 | -7.998 | 1090                       | 24.12                        | 2.85          | 0.67            |
| 16011 | Clonmel         | Suir       | 52.352 | -7.695 | 2144                       | 49.29                        | 3.05          | 0.65            |
| 18002 | Ballyduff       | Blackwater | 52.144 | -8.052 | 2334                       | 60.67                        | 3.48          | 0.65            |
| 18003 | Killavullen     | Blackwater | 52.149 | -8.515 | 1257                       | 35.35                        | 3.73          | 0.65            |
| 18006 | Cset Mallow     | Blackwater | 52.127 | -8.694 | 1052                       | 32.16                        | 3.79          | 0.70            |
| 18050 | Duarrigle       | Blackwater | 52.096 | -9.097 | 250                        | 7.72                         | 4.36          | 0.61            |
| 22006 | Flesk           | Flesk      | 52.048 | -9.498 | 329                        | 14.18                        | 5.10          | 0.73            |
| 22035 | Laune<br>Bridge | Laune      | 52.062 | -9.617 | 560                        | 27.75                        | 5.41          | 0.79            |

|       |               |                |        |        |      |       |      |      |
|-------|---------------|----------------|--------|--------|------|-------|------|------|
| 23002 | Listowel      | Feale          | 52.443 | -9.476 | 647  | 22.21 | 3.96 | 0.75 |
| 24008 | Castleroberts | Maigue         | 52.543 | -8.767 | 806  | 13.04 | 2.67 | 0.52 |
| 24030 | Danganbeg     | Deel           | 52.409 | -9.002 | 259  | 4.49  | 2.91 | 0.52 |
| 25002 | Barrington    | Newport        | 52.645 | -8.475 | 230  | 5.77  | 3.54 | 0.61 |
| 25006 | Ferbane       | Brosna         | 53.27  | -7.828 | 1163 | 16.79 | 2.52 | 0.49 |
| 25030 | Scarriff      | Graney         | 52.908 | -8.533 | 279  | 8.28  | 3.27 | 0.78 |
| 25034 | Rochfort      | L. Ennell Trib | 53.466 | -7.374 | 11   | 0.18  | 2.69 | 0.53 |
| 26021 | Ballymahon    | Inny           | 53.563 | -7.758 | 1099 | 18.67 | 2.65 | 0.55 |
| 26058 | Ballyrink Br. | Inny Upper     | 53.776 | -7.25  | 60   | 1.20  | 2.74 | 0.63 |
| 27002 | Ballycorey    | Fergus         | 52.87  | -8.975 | 511  | 10.22 | 3.61 | 0.48 |
| 30007 | Ballygaddy    | Clare          | 53.531 | -8.874 | 470  | 10.24 | 3.16 | 0.60 |
| 32012 | Newport       | Newport        | 53.89  | -9.525 | 146  | 5.87  | 4.64 | 0.75 |
| 33001 | Glenamoy      | Glenamoy       | 54.24  | -9.696 | 76   | 2.85  | 4.45 | 0.73 |
| 34001 | Rahans        | Moy            | 54.104 | -9.158 | 1975 | 54.70 | 3.65 | 0.65 |
| 35002 | Billa Bridge  | Owenbeg        | 54.179 | -8.553 | 81   | 3.51  | 4.37 | 0.86 |
| 35005 | Ballysadare   | Ballysadare    | 54.209 | -8.509 | 640  | 17.01 | 3.48 | 0.66 |
| 36015 | Anlore        | Finn           | 54.177 | -7.177 | 153  | 3.29  | 2.93 | 0.63 |
| 36019 | Belturbet     | Erne           | 54.098 | -7.451 | 1492 | 28.54 | 2.84 | 0.58 |
| 38001 | Clonconwal    | Ownea          | 54.782 | -8.365 | 111  | 5.46  | 5.18 | 0.82 |
| 39009 | Aghawoney     | Fern O/L       | 55.044 | -7.721 | 207  | 8.17  | 4.34 | 0.78 |

---

**Table S2 Median and 90 percent confidence interval of projected changes (percent) in seasonal flows simulated for each catchment using the SMART hydrological model for each future time period and SSP.**

| Catchment | SSP126 |      |       |       |      |       |       |      |      |
|-----------|--------|------|-------|-------|------|-------|-------|------|------|
|           | DJF    |      |       |       |      |       |       |      |      |
|           | 2020s  |      |       | 2050s |      |       | 2080s |      |      |
|           | med    | upp  | low   | med   | upp  | low   | med   | upp  | low  |
| S06013    | 5.0    | 39.5 | -10.5 | 5.6   | 51.9 | -7.5  | 12.2  | 56.8 | -3.4 |
| S06014    | 4.6    | 37.0 | -10.0 | 5.5   | 48.7 | -7.1  | 11.6  | 53.5 | -3.1 |
| S07009    | 3.2    | 24.3 | -3.9  | 6.8   | 34.1 | 0.1   | 17.0  | 38.4 | 4.9  |
| S07012    | 2.9    | 22.4 | -3.5  | 6.2   | 31.6 | 0.7   | 16.2  | 35.5 | 4.9  |
| S12001    | 4.9    | 18.2 | -2.7  | 9.3   | 27.5 | 1.2   | 20.2  | 32.1 | 7.1  |
| S14007    | 2.9    | 10.8 | -4.8  | 6.6   | 17.0 | -0.5  | 16.0  | 24.0 | 5.5  |
| S15003    | 3.5    | 13.9 | -4.0  | 6.8   | 21.0 | 2.4   | 18.3  | 26.9 | 7.3  |
| S15006    | 3.4    | 26.5 | -4.0  | 6.8   | 38.6 | 1.1   | 17.5  | 39.8 | 5.9  |
| S15007    | 2.2    | 23.9 | -6.9  | 4.2   | 34.9 | -1.2  | 15.3  | 35.4 | 2.3  |
| S16008    | 1.9    | 21.0 | -5.8  | 4.3   | 31.9 | -1.0  | 14.5  | 33.7 | 1.8  |
| S16011    | 2.8    | 21.8 | -5.3  | 5.0   | 32.9 | -0.9  | 14.6  | 34.7 | 2.1  |
| S18002    | 0.7    | 35.6 | -6.5  | 3.5   | 48.9 | -2.3  | 9.0   | 49.9 | 2.3  |
| S18003    | 0.6    | 34.0 | -6.1  | 3.7   | 46.8 | -2.0  | 9.5   | 47.6 | 2.5  |
| S18006    | 0.6    | 33.9 | -6.2  | 3.8   | 46.4 | -2.1  | 9.6   | 47.2 | 2.5  |
| S18050    | 0.5    | 32.2 | -6.2  | 3.9   | 43.7 | -2.0  | 9.6   | 44.1 | 2.6  |
| S22006    | 0.6    | 33.1 | -6.1  | 4.1   | 45.1 | -2.0  | 9.9   | 45.5 | 2.9  |
| S22035    | 2.5    | 31.8 | -8.8  | 6.6   | 44.4 | -6.8  | 8.3   | 46.4 | 1.3  |
| S23002    | -0.7   | 38.1 | -7.3  | 2.7   | 51.6 | -3.0  | 12.6  | 52.7 | 3.9  |
| S24008    | -0.5   | 36.7 | -6.9  | 3.0   | 49.8 | -2.7  | 13.1  | 50.7 | 4.6  |
| S24030    | 2.2    | 20.7 | -7.4  | 3.8   | 31.1 | -1.6  | 14.7  | 32.1 | 1.8  |
| S25002    | 2.3    | 22.7 | -7.3  | 3.9   | 33.2 | -1.5  | 14.9  | 33.2 | 2.0  |
| S25006    | 2.8    | 21.6 | -5.4  | 4.8   | 32.7 | -1.2  | 15.1  | 35.2 | 2.4  |
| S25030    | -1.2   | 38.1 | -6.9  | 2.4   | 54.0 | -1.5  | 13.9  | 54.4 | 1.3  |
| S25034    | 3.3    | 20.5 | -3.1  | 6.6   | 31.3 | 0.1   | 16.3  | 33.5 | 4.9  |
| S26021    | 2.9    | 19.4 | -2.9  | 6.1   | 29.6 | 0.2   | 15.0  | 31.8 | 4.2  |
| S26058    | 1.1    | 8.7  | -3.3  | 5.5   | 12.3 | 0.1   | 12.2  | 18.2 | 4.2  |
| S27002    | -0.9   | 36.5 | -5.5  | 2.7   | 52.0 | -1.1  | 13.2  | 52.9 | 1.2  |
| S30007    | -0.6   | 30.6 | -5.6  | 2.3   | 45.2 | -1.7  | 11.5  | 46.0 | 0.9  |
| S32012    | 3.7    | 52.1 | -9.7  | 3.5   | 70.2 | -11.1 | 11.6  | 72.0 | -2.7 |
| S33001    | 1.0    | 67.5 | -13.4 | -0.7  | 88.8 | -11.6 | 5.1   | 89.9 | -5.3 |
| S34001    | 2.5    | 55.4 | -9.3  | 1.7   | 73.6 | -8.5  | 7.4   | 76.2 | -6.2 |
| S35002    | -1.1   | 52.5 | -13.8 | -3.8  | 71.1 | -10.3 | 3.5   | 72.6 | -7.7 |
| S35005    | 2.5    | 13.0 | -9.0  | 3.0   | 20.3 | -7.1  | 8.6   | 23.1 | -3.4 |
| S36015    | -1.5   | 15.7 | -10.6 | -0.9  | 24.3 | -8.5  | 10.9  | 28.2 | -3.5 |
| S36019    | 3.8    | 17.9 | -8.6  | 4.9   | 25.5 | -6.9  | 9.9   | 30.1 | -3.2 |
| S38001    | -0.9   | 13.8 | -12.0 | -2.4  | 21.6 | -10.0 | 4.1   | 23.1 | -7.4 |
| S39009    | 3.6    | 58.9 | -7.8  | 1.6   | 77.0 | -11.1 | 12.6  | 78.8 | -4.5 |

| SSP370    |       |      |      |       |      |      |       |      |      |
|-----------|-------|------|------|-------|------|------|-------|------|------|
| DJF       |       |      |      |       |      |      |       |      |      |
| Catchment | 2020s |      |      | 2050s |      |      | 2080s |      |      |
|           | med   | upp  | low  | med   | upp  | low  | med   | upp  | low  |
| S06013    | 6.5   | 19.0 | -2.1 | 14.1  | 33.1 | -3.4 | 14.6  | 49.1 | 5.7  |
| S06014    | 6.3   | 18.1 | -2.1 | 13.5  | 32.0 | -3.6 | 13.8  | 47.0 | 5.2  |
| S07009    | 6.0   | 20.1 | -2.5 | 13.0  | 32.5 | -3.6 | 15.5  | 46.9 | 4.4  |
| S07012    | 5.7   | 19.4 | -2.4 | 12.5  | 31.0 | -3.6 | 14.6  | 44.9 | 4.4  |
| S12001    | 9.4   | 21.7 | -0.3 | 14.6  | 24.2 | 4.6  | 17.6  | 39.6 | 12.8 |
| S14007    | 7.2   | 21.3 | -7.9 | 14.0  | 22.5 | 4.5  | 16.7  | 40.1 | 12.3 |
| S15003    | 6.4   | 21.9 | -4.0 | 12.6  | 18.3 | 2.6  | 17.2  | 23.7 | 11.4 |
| S15006    | 6.4   | 18.6 | -3.8 | 11.0  | 18.3 | 2.5  | 15.6  | 22.7 | 10.7 |
| S15007    | 5.7   | 18.2 | -3.9 | 10.2  | 16.8 | 2.2  | 14.6  | 21.6 | 9.9  |
| S16008    | 5.4   | 21.1 | -1.1 | 10.9  | 17.9 | 1.9  | 16.1  | 21.1 | 8.1  |
| S16011    | 5.6   | 21.1 | -0.9 | 10.7  | 18.1 | 2.1  | 16.3  | 21.4 | 8.2  |
| S18002    | 4.7   | 19.6 | -1.3 | 9.5   | 17.0 | 1.6  | 13.9  | 19.5 | 7.3  |
| S18003    | 4.4   | 19.9 | -1.3 | 9.3   | 16.5 | 1.3  | 13.5  | 18.9 | 7.5  |
| S18006    | 4.2   | 20.1 | -1.4 | 9.2   | 16.2 | 1.0  | 13.4  | 18.7 | 7.5  |
| S18050    | 3.8   | 19.7 | -1.1 | 8.7   | 15.1 | -0.9 | 12.8  | 17.5 | 3.5  |
| S22006    | 4.3   | 19.7 | -0.8 | 9.1   | 15.5 | -0.7 | 13.2  | 18.3 | 3.8  |
| S22035    | 4.2   | 18.9 | -0.5 | 9.5   | 16.8 | -0.7 | 13.2  | 19.3 | 3.5  |
| S23002    | 4.5   | 21.0 | -1.5 | 10.2  | 17.6 | 1.0  | 14.4  | 20.5 | 7.9  |
| S24008    | 4.4   | 21.5 | -1.5 | 10.2  | 17.1 | 0.8  | 14.3  | 20.0 | 8.3  |
| S24030    | 5.8   | 21.5 | -1.4 | 11.0  | 16.9 | 1.0  | 15.7  | 20.6 | 8.0  |
| S25002    | 6.0   | 17.6 | -1.2 | 9.6   | 15.8 | 1.1  | 13.9  | 20.7 | 8.1  |
| S25006    | 4.3   | 17.8 | -8.0 | 11.9  | 20.8 | -3.4 | 12.0  | 37.4 | 4.6  |
| S25030    | 4.8   | 18.0 | -1.1 | 9.3   | 16.9 | -1.6 | 12.6  | 20.6 | 6.5  |
| S25034    | 4.7   | 16.7 | -7.2 | 11.9  | 21.8 | -3.0 | 12.3  | 37.8 | 4.4  |
| S26021    | 4.0   | 15.9 | -7.1 | 10.8  | 20.8 | -3.5 | 11.6  | 36.0 | 3.7  |
| S26058    | 3.9   | 17.6 | -7.3 | 12.0  | 19.9 | -3.4 | 13.3  | 34.9 | 3.9  |
| S27002    | 4.9   | 17.2 | -1.0 | 9.1   | 17.3 | -2.1 | 12.3  | 20.2 | 5.8  |
| S30007    | 5.0   | 16.0 | -6.1 | 10.9  | 17.4 | -3.5 | 10.9  | 30.2 | 1.7  |
| S32012    | 2.5   | 14.1 | -5.8 | 9.9   | 15.7 | -5.4 | 8.4   | 26.8 | 0.3  |
| S33001    | 3.3   | 16.5 | -6.6 | 11.4  | 16.0 | -3.3 | 9.0   | 26.7 | 1.8  |
| S34001    | 3.4   | 14.0 | -4.7 | 11.1  | 16.8 | -5.8 | 10.9  | 29.9 | 0.6  |
| S35002    | 3.8   | 14.6 | -6.7 | 10.5  | 15.9 | -4.8 | 10.0  | 26.4 | 1.2  |
| S35005    | 2.3   | 14.5 | -7.3 | 9.1   | 14.9 | -3.5 | 9.2   | 27.5 | 4.3  |
| S36015    | 3.4   | 18.2 | -8.1 | 11.8  | 17.7 | -3.1 | 11.0  | 32.5 | 6.1  |
| S36019    | 2.9   | 15.9 | -7.2 | 12.1  | 19.3 | -4.0 | 10.7  | 34.4 | 4.0  |
| S38001    | 1.4   | 12.7 | -6.4 | 8.6   | 13.5 | -4.8 | 6.9   | 24.6 | 1.0  |
| S39009    | 0.9   | 12.3 | -5.7 | 9.2   | 14.4 | -5.6 | 7.2   | 25.9 | -0.2 |

| SSP585    |       |      |      |       |      |       |       |      |      |
|-----------|-------|------|------|-------|------|-------|-------|------|------|
| DJF       |       |      |      |       |      |       |       |      |      |
| Catchment | 2020s |      |      | 2050s |      |       | 2080s |      |      |
|           | med   | upp  | low  | med   | upp  | low   | med   | upp  | low  |
| S06013    | 7.3   | 14.1 | 4.2  | 12.5  | 20.4 | 3.2   | 18.6  | 29.4 | 10.4 |
| S06014    | 6.7   | 13.0 | 4.0  | 11.3  | 19.0 | 2.7   | 17.5  | 27.3 | 9.8  |
| S07009    | 8.5   | 13.4 | 4.1  | 10.8  | 17.8 | 3.4   | 15.7  | 26.4 | 10.0 |
| S07012    | 7.8   | 11.9 | 4.2  | 9.8   | 16.6 | 3.1   | 14.7  | 24.7 | 9.3  |
| S12001    | 8.2   | 16.8 | 2.3  | 11.5  | 21.1 | 4.1   | 17.4  | 28.5 | 11.4 |
| S14007    | 9.2   | 14.3 | 4.0  | 11.6  | 19.0 | 3.5   | 15.9  | 28.1 | 9.1  |
| S15003    | 7.9   | 11.6 | 4.3  | 10.2  | 17.6 | 3.1   | 16.0  | 26.8 | 8.6  |
| S15006    | 7.2   | 12.4 | 3.4  | 10.5  | 17.8 | 3.1   | 16.4  | 26.3 | 8.7  |
| S15007    | 6.2   | 10.1 | 3.0  | 8.8   | 15.5 | 2.6   | 13.7  | 24.1 | 7.8  |
| S16008    | 7.4   | 10.9 | 4.5  | 10.1  | 16.9 | 2.4   | 15.7  | 23.8 | 7.6  |
| S16011    | 8.3   | 11.9 | 4.7  | 11.0  | 18.2 | 3.1   | 16.2  | 24.7 | 8.2  |
| S18002    | 8.6   | 13.1 | 3.6  | 13.0  | 19.4 | 2.6   | 15.7  | 24.9 | 2.6  |
| S18003    | 6.6   | 12.2 | 1.5  | 8.9   | 18.8 | 2.1   | 12.7  | 24.4 | 2.3  |
| S18006    | 6.5   | 12.1 | 1.3  | 8.9   | 18.6 | 2.0   | 12.5  | 24.3 | 2.2  |
| S18050    | 5.8   | 11.3 | 0.7  | 8.3   | 17.6 | 1.5   | 11.4  | 22.8 | 1.8  |
| S22006    | 6.2   | 11.7 | 1.0  | 8.6   | 18.1 | 1.7   | 12.0  | 23.6 | 2.5  |
| S22035    | 6.5   | 12.6 | 2.6  | 9.7   | 18.4 | 2.2   | 10.5  | 23.6 | 2.4  |
| S23002    | 10.1  | 13.3 | 4.7  | 13.2  | 20.7 | 4.8   | 17.0  | 26.5 | 9.5  |
| S24008    | 9.7   | 12.8 | 4.8  | 12.7  | 20.1 | 4.5   | 16.5  | 26.1 | 9.3  |
| S24030    | 8.6   | 12.0 | 4.3  | 11.5  | 16.6 | 2.9   | 13.7  | 24.6 | 7.0  |
| S25002    | 7.4   | 11.6 | 3.7  | 9.7   | 14.7 | 2.9   | 13.0  | 24.1 | 7.1  |
| S25006    | 7.3   | 13.1 | 4.9  | 10.5  | 17.4 | 3.6   | 14.5  | 26.1 | 9.9  |
| S25030    | 7.6   | 12.1 | 4.6  | 10.0  | 18.3 | 4.7   | 14.3  | 25.1 | 9.4  |
| S25034    | 7.3   | 12.6 | 4.4  | 10.2  | 16.9 | 3.3   | 14.0  | 24.7 | 9.4  |
| S26021    | 6.3   | 11.2 | 4.1  | 9.2   | 15.4 | 2.6   | 13.4  | 22.6 | 8.4  |
| S26058    | 7.0   | 11.4 | 5.2  | 8.5   | 15.8 | 2.8   | 13.9  | 22.4 | 6.9  |
| S27002    | 8.7   | 12.0 | 4.3  | 10.6  | 17.5 | 5.0   | 13.8  | 23.9 | 9.6  |
| S30007    | 7.4   | 11.6 | 3.5  | 9.2   | 17.4 | 3.3   | 12.9  | 21.8 | 8.0  |
| S32012    | 6.4   | 11.0 | 0.7  | 8.7   | 17.0 | 2.3   | 11.6  | 21.2 | 2.9  |
| S33001    | 6.5   | 11.3 | -9.2 | 7.7   | 17.8 | -10.9 | 10.6  | 22.0 | -8.5 |
| S34001    | 6.9   | 11.0 | 1.6  | 9.6   | 16.9 | 2.1   | 12.9  | 23.5 | 6.1  |
| S35002    | 6.5   | 11.1 | 1.2  | 8.9   | 16.9 | 1.2   | 11.1  | 22.7 | 5.7  |
| S35005    | 5.1   | 9.9  | 3.2  | 6.3   | 13.5 | 1.6   | 10.8  | 19.1 | 6.1  |
| S36015    | 6.8   | 15.3 | 3.7  | 8.7   | 19.0 | 3.1   | 14.6  | 30.0 | 9.5  |
| S36019    | 6.3   | 11.0 | 4.2  | 8.2   | 16.1 | 2.4   | 13.4  | 22.6 | 7.2  |
| S38001    | 8.0   | 11.6 | -0.4 | 9.1   | 13.9 | 0.6   | 10.0  | 19.4 | 2.7  |
| S39009    | 7.8   | 11.5 | 0.1  | 9.9   | 16.9 | 0.9   | 10.0  | 22.6 | 4.9  |

| SSP126<br>MAM |       |      |       |       |      |       |       |      |       |
|---------------|-------|------|-------|-------|------|-------|-------|------|-------|
| Catchment     | 2020s |      |       | 2050s |      |       | 2080s |      |       |
|               | med   | upp  | low   | med   | upp  | low   | med   | upp  | low   |
| S06013        | 4.5   | 41.1 | -14.3 | 10.1  | 30.3 | -6.5  | 6.0   | 41.7 | -11.1 |
| S06014        | 4.8   | 40.1 | -13.6 | 10.1  | 30.0 | -5.8  | 6.2   | 41.1 | -9.6  |
| S07009        | 2.5   | 21.8 | -11.1 | 4.3   | 22.1 | -4.9  | 6.5   | 23.1 | -6.5  |
| S07012        | 2.6   | 21.6 | -11.0 | 4.1   | 22.0 | -4.8  | 6.3   | 22.5 | -6.8  |
| S12001        | 3.3   | 22.8 | -8.8  | 6.9   | 22.5 | -3.1  | 10.8  | 24.8 | -3.5  |
| S14007        | 0.5   | 20.5 | -11.3 | -1.3  | 24.3 | -11.8 | -1.6  | 24.8 | -9.5  |
| S15003        | 2.3   | 32.4 | -11.8 | 4.0   | 28.9 | -5.8  | 7.7   | 28.3 | -9.4  |
| S15006        | 2.5   | 44.3 | -10.6 | 11.9  | 31.2 | -4.7  | 9.0   | 36.1 | -6.8  |
| S15007        | -0.8  | 43.8 | -12.8 | 9.2   | 29.2 | -10.2 | 6.4   | 34.4 | -11.6 |
| S16008        | -0.5  | 24.9 | -12.7 | 2.0   | 22.7 | -9.6  | 4.0   | 23.4 | -9.3  |
| S16011        | -0.4  | 21.3 | -10.9 | 2.2   | 20.1 | -8.3  | 3.9   | 21.0 | -8.1  |
| S18002        | 3.7   | 35.2 | -5.2  | 6.6   | 23.8 | -7.1  | 5.2   | 30.2 | -4.1  |
| S18003        | 4.2   | 35.0 | -5.5  | 7.3   | 23.3 | -7.1  | 5.7   | 29.3 | -4.8  |
| S18006        | 4.2   | 35.1 | -5.7  | 7.3   | 22.8 | -7.5  | 5.4   | 28.3 | -5.9  |
| S18050        | 4.5   | 33.6 | -6.0  | 7.5   | 21.6 | -7.8  | 5.7   | 26.4 | -6.7  |
| S22006        | 4.5   | 32.8 | -5.0  | 7.7   | 21.8 | -6.9  | 6.6   | 28.2 | -5.3  |
| S22035        | 2.8   | 32.2 | -7.1  | 6.1   | 22.1 | -11.3 | 5.0   | 27.8 | -5.4  |
| S23002        | 2.3   | 42.0 | -8.4  | 8.2   | 25.8 | -10.6 | 8.6   | 32.5 | -7.7  |
| S24008        | 3.3   | 42.3 | -8.4  | 8.8   | 24.6 | -10.4 | 9.4   | 32.2 | -8.3  |
| S24030        | -0.2  | 23.2 | -11.6 | 0.9   | 21.7 | -9.7  | 2.9   | 20.9 | -11.1 |
| S25002        | 0.0   | 38.5 | -11.0 | 8.2   | 25.7 | -9.5  | 6.5   | 31.1 | -10.8 |
| S25006        | -1.0  | 18.4 | -12.8 | -1.8  | 20.1 | -10.5 | 0.3   | 21.2 | -10.2 |
| S25030        | -1.4  | 54.9 | -11.8 | 5.8   | 40.0 | -9.2  | 5.7   | 51.6 | -10.3 |
| S25034        | 3.4   | 18.0 | -9.9  | 4.6   | 19.8 | -3.9  | 6.6   | 21.3 | -4.4  |
| S26021        | 3.3   | 17.1 | -10.1 | 4.9   | 18.9 | -3.9  | 6.1   | 19.9 | -3.9  |
| S26058        | -0.9  | 16.2 | -10.0 | -0.9  | 18.7 | -11.0 | -2.1  | 19.3 | -9.6  |
| S27002        | -1.6  | 58.2 | -13.1 | 6.0   | 44.1 | -10.2 | 5.3   | 54.5 | -8.8  |
| S30007        | -2.0  | 28.2 | -11.6 | 4.7   | 18.5 | -9.8  | 4.7   | 28.1 | -8.7  |
| S32012        | 0.6   | 39.4 | -13.5 | 7.4   | 31.6 | -18.8 | 4.6   | 44.4 | -14.4 |
| S33001        | -0.2  | 48.2 | -13.3 | -2.6  | 44.1 | -19.5 | -4.5  | 53.8 | -15.3 |
| S34001        | -0.1  | 40.1 | -14.3 | 4.6   | 35.5 | -10.7 | 3.0   | 46.0 | -9.1  |
| S35002        | -0.9  | 38.4 | -10.0 | -2.3  | 30.8 | -8.7  | -4.2  | 43.2 | -12.1 |
| S35005        | 3.3   | 18.8 | -11.3 | 1.6   | 19.2 | -4.5  | 1.8   | 18.7 | -7.5  |
| S36015        | 3.0   | 22.3 | -14.2 | 0.2   | 7.4  | -4.4  | -4.4  | 18.9 | -10.4 |
| S36019        | 4.1   | 21.6 | -13.4 | 0.2   | 21.3 | -4.9  | 3.3   | 21.5 | -9.2  |
| S38001        | -0.1  | 16.1 | -9.4  | -2.0  | 4.0  | -7.5  | -3.1  | 13.6 | -9.3  |
| S39009        | 5.4   | 42.0 | -7.2  | 2.7   | 37.8 | -12.7 | 3.5   | 45.5 | -9.0  |

| SSP370<br>MAM |       |      |       |       |      |       |       |      |       |
|---------------|-------|------|-------|-------|------|-------|-------|------|-------|
| Catchment     | 2020s |      |       | 2050s |      |       | 2080s |      |       |
|               | med   | upp  | low   | med   | upp  | low   | med   | upp  | low   |
| S06013        | 2.5   | 18.8 | -6.4  | 3.4   | 16.2 | -1.9  | 5.5   | 37.6 | -6.2  |
| S06014        | 2.5   | 18.4 | -5.8  | 3.5   | 16.3 | -1.6  | 5.6   | 37.3 | -5.7  |
| S07009        | 1.6   | 18.8 | -6.2  | 3.5   | 15.6 | 0.0   | 5.3   | 35.3 | -5.3  |
| S07012        | 1.7   | 18.6 | -6.2  | 3.1   | 15.7 | -0.3  | 4.9   | 34.4 | -5.6  |
| S12001        | 1.1   | 19.2 | -7.4  | 6.7   | 15.3 | 0.8   | 4.9   | 30.0 | -2.7  |
| S14007        | -0.9  | 20.8 | -13.0 | 5.5   | 12.4 | -8.8  | 5.7   | 24.9 | -4.9  |
| S15003        | -2.7  | 21.7 | -9.8  | 2.6   | 13.3 | -7.7  | 0.5   | 19.6 | -7.8  |
| S15006        | -2.5  | 21.6 | -9.2  | 4.5   | 11.3 | -6.1  | 3.4   | 16.0 | -6.3  |
| S15007        | -2.6  | 19.1 | -8.9  | 3.1   | 11.0 | -7.3  | 2.5   | 15.4 | -7.7  |
| S16008        | -2.8  | 15.3 | -8.8  | 1.1   | 10.2 | -5.8  | 1.2   | 16.8 | -7.8  |
| S16011        | -2.2  | 13.8 | -7.4  | 2.0   | 9.7  | -4.5  | 1.9   | 14.1 | -6.2  |
| S18002        | -0.2  | 13.2 | -6.2  | 3.0   | 10.3 | -4.8  | 2.7   | 15.1 | -6.3  |
| S18003        | -0.4  | 12.3 | -5.9  | 2.1   | 10.4 | -5.2  | 2.1   | 15.7 | -7.0  |
| S18006        | -0.5  | 11.5 | -5.9  | 1.5   | 10.3 | -5.8  | 1.5   | 15.2 | -7.9  |
| S18050        | -1.7  | 10.4 | -11.9 | -1.4  | 10.4 | -10.8 | -1.2  | 15.1 | -13.1 |
| S22006        | -1.2  | 11.0 | -11.1 | -0.7  | 10.8 | -10.8 | 0.9   | 16.5 | -11.9 |
| S22035        | -0.2  | 12.0 | -11.2 | 0.0   | 11.5 | -9.9  | 2.1   | 19.4 | -10.2 |
| S23002        | -1.3  | 15.4 | -8.5  | 2.3   | 10.9 | -7.3  | 1.9   | 14.9 | -9.1  |
| S24008        | -1.4  | 14.2 | -7.7  | 1.6   | 10.8 | -7.3  | 1.5   | 16.1 | -9.7  |
| S24030        | -3.1  | 12.1 | -8.4  | -0.5  | 8.9  | -6.9  | 0.1   | 13.7 | -9.4  |
| S25002        | -2.9  | 15.7 | -7.9  | 1.9   | 10.0 | -6.6  | 1.2   | 13.5 | -8.8  |
| S25006        | -0.9  | 19.6 | -13.1 | 4.1   | 10.1 | -8.4  | 7.0   | 19.1 | -5.5  |
| S25030        | -1.0  | 15.0 | -6.4  | 1.9   | 12.1 | -6.3  | 1.4   | 15.9 | -8.5  |
| S25034        | -0.4  | 19.9 | -12.8 | 5.4   | 11.1 | -7.6  | 7.5   | 21.7 | -4.6  |
| S26021        | -0.8  | 19.7 | -13.3 | 4.7   | 10.5 | -8.6  | 7.5   | 19.5 | -4.8  |
| S26058        | -0.9  | 16.4 | -13.0 | 3.0   | 10.8 | -8.8  | 4.0   | 18.4 | -5.4  |
| S27002        | -0.7  | 17.3 | -7.7  | 3.4   | 12.4 | -6.1  | 2.2   | 17.7 | -9.6  |
| S30007        | -0.6  | 14.5 | -11.9 | 1.7   | 11.8 | -9.3  | 4.1   | 18.6 | -9.3  |
| S32012        | 0.1   | 9.2  | -11.2 | -1.0  | 11.8 | -12.2 | 1.6   | 18.5 | -12.1 |
| S33001        | -0.8  | 8.6  | -11.2 | -0.9  | 12.0 | -12.7 | 2.4   | 19.2 | -12.5 |
| S34001        | 0.7   | 9.6  | -11.9 | 2.2   | 11.4 | -9.1  | 3.2   | 17.9 | -9.2  |
| S35002        | -1.0  | 8.2  | -11.5 | -1.0  | 10.8 | -10.9 | 1.6   | 17.0 | -10.5 |
| S35005        | -0.8  | 15.2 | -12.0 | 0.1   | 10.7 | -11.0 | 3.0   | 13.8 | -7.6  |
| S36015        | -1.6  | 19.1 | -13.4 | 0.0   | 12.4 | -14.5 | 2.8   | 18.2 | -10.2 |
| S36019        | -1.1  | 17.3 | -14.1 | 1.4   | 11.6 | -12.2 | 4.2   | 18.3 | -7.4  |
| S38001        | -2.1  | 11.6 | -11.3 | -3.3  | 10.4 | -12.5 | -2.1  | 14.3 | -11.0 |
| S39009        | -2.5  | 11.1 | -11.8 | -3.3  | 9.8  | -12.6 | -2.1  | 14.0 | -10.6 |

SSP585  
MAM

| Catchment | 2020s |      |       | 2050s |      |       | 2080s |      |       |
|-----------|-------|------|-------|-------|------|-------|-------|------|-------|
|           | med   | upp  | low   | med   | upp  | low   | med   | upp  | low   |
| S06013    | 4.6   | 10.9 | -7.2  | -1.3  | 17.2 | -8.6  | 9.4   | 25.9 | -11.4 |
| S06014    | 4.4   | 10.4 | -6.9  | -1.2  | 16.5 | -7.7  | 9.2   | 25.0 | -10.9 |
| S07009    | 5.6   | 11.0 | -6.1  | 2.0   | 16.3 | -8.5  | 5.7   | 23.4 | -10.9 |
| S07012    | 5.7   | 10.9 | -6.3  | 2.2   | 15.9 | -8.2  | 5.2   | 22.6 | -10.9 |
| S12001    | 3.4   | 10.0 | -3.2  | 2.9   | 10.3 | -4.7  | 5.7   | 21.1 | -5.8  |
| S14007    | 2.5   | 10.8 | -5.9  | 2.8   | 9.6  | -8.0  | 5.9   | 18.7 | -9.7  |
| S15003    | 4.3   | 15.9 | -4.8  | 1.9   | 8.8  | -9.6  | 5.2   | 20.5 | -10.5 |
| S15006    | 4.4   | 14.4 | -5.4  | 3.1   | 10.2 | -7.6  | 7.5   | 19.5 | -9.7  |
| S15007    | 1.4   | 14.9 | -6.8  | 1.7   | 9.4  | -7.0  | 4.1   | 15.4 | -10.3 |
| S16008    | 3.4   | 11.3 | -5.1  | 1.8   | 8.9  | -7.2  | 6.4   | 18.6 | -10.2 |
| S16011    | 4.1   | 10.2 | -3.4  | 2.3   | 7.9  | -5.2  | 5.5   | 16.5 | -7.3  |
| S18002    | 3.1   | 12.5 | -17.0 | 2.5   | 7.9  | -12.4 | 4.4   | 15.0 | -14.5 |
| S18003    | 2.9   | 12.7 | -17.3 | 1.3   | 7.5  | -12.3 | 3.4   | 14.1 | -14.6 |
| S18006    | 2.6   | 13.0 | -17.6 | 1.0   | 7.4  | -12.5 | 2.8   | 13.6 | -15.0 |
| S18050    | 1.9   | 12.4 | -17.3 | 0.7   | 6.9  | -12.3 | 2.1   | 13.2 | -14.9 |
| S22006    | 2.2   | 12.6 | -15.0 | 1.5   | 6.6  | -9.6  | 2.2   | 14.1 | -11.3 |
| S22035    | 3.0   | 13.5 | -15.3 | 1.4   | 8.1  | -9.5  | 3.1   | 13.8 | -11.5 |
| S23002    | 4.6   | 14.1 | -9.3  | 3.1   | 11.1 | -7.9  | 4.3   | 18.2 | -7.2  |
| S24008    | 3.4   | 14.6 | -9.5  | 2.4   | 10.7 | -7.9  | 3.8   | 18.3 | -7.5  |
| S24030    | 2.4   | 11.7 | -4.7  | 0.5   | 9.7  | -7.3  | 2.4   | 15.0 | -9.8  |
| S25002    | 3.6   | 13.9 | -4.3  | 2.6   | 9.3  | -5.4  | 3.5   | 14.5 | -8.5  |
| S25006    | 3.7   | 12.1 | -5.4  | 3.8   | 11.7 | -7.7  | 5.0   | 19.0 | -9.5  |
| S25030    | 2.1   | 18.7 | -6.7  | 3.3   | 11.5 | -5.3  | 3.6   | 18.5 | -7.3  |
| S25034    | 4.7   | 12.4 | -4.1  | 4.2   | 12.6 | -6.0  | 6.0   | 20.2 | -7.8  |
| S26021    | 4.0   | 11.2 | -4.9  | 3.8   | 11.8 | -6.8  | 5.3   | 19.0 | -8.8  |
| S26058    | 3.2   | 9.6  | -6.2  | 2.8   | 11.5 | -6.8  | 0.8   | 15.3 | -8.8  |
| S27002    | 1.5   | 18.3 | -8.6  | 2.0   | 13.0 | -5.7  | 6.2   | 19.7 | -7.6  |
| S30007    | -0.5  | 15.0 | -7.3  | 2.7   | 12.5 | -4.7  | 5.1   | 16.1 | -6.0  |
| S32012    | -1.2  | 16.5 | -6.7  | 3.4   | 13.0 | -6.1  | 6.4   | 18.8 | -6.6  |
| S33001    | 5.1   | 16.2 | -5.9  | 3.7   | 11.7 | -11.0 | -1.3  | 16.8 | -8.1  |
| S34001    | -1.5  | 12.6 | -6.4  | 2.8   | 12.1 | -4.5  | 6.4   | 15.1 | -5.2  |
| S35002    | 5.9   | 16.4 | -5.1  | 3.8   | 12.5 | -4.7  | 6.4   | 18.4 | -5.9  |
| S35005    | 2.7   | 9.5  | -7.4  | -1.2  | 10.2 | -7.6  | 3.6   | 14.0 | -9.5  |
| S36015    | 8.7   | 16.3 | -10.3 | 3.9   | 15.6 | -8.2  | 9.8   | 19.7 | -6.4  |
| S36019    | 2.8   | 10.0 | -8.3  | -0.7  | 12.2 | -7.9  | 4.4   | 16.4 | -11.4 |
| S38001    | 6.1   | 15.0 | -4.7  | 5.4   | 13.5 | -5.2  | 3.4   | 15.7 | -4.6  |
| S39009    | 4.9   | 13.5 | -4.5  | 5.1   | 14.8 | -3.5  | 6.8   | 14.3 | -4.9  |



| SSP126    |       |       |       |       |       |       |       |       |       |
|-----------|-------|-------|-------|-------|-------|-------|-------|-------|-------|
| JJA       |       |       |       |       |       |       |       |       |       |
| Catchment | 2020s |       |       | 2050s |       |       | 2080s |       |       |
|           | med   | upp   | low   | med   | upp   | low   | med   | upp   | low   |
| S06013    | -0.6  | 65.2  | -14.3 | -0.5  | 73.4  | -13.0 | -8.7  | 66.9  | -24.5 |
| S06014    | 1.4   | 63.1  | -13.5 | 0.1   | 71.5  | -11.8 | -7.4  | 63.2  | -23.6 |
| S07009    | -3.1  | 22.5  | -16.6 | -11.8 | 12.4  | -23.1 | -17.0 | 17.1  | -32.1 |
| S07012    | -2.9  | 23.2  | -17.5 | -12.7 | 14.2  | -23.4 | -17.7 | 18.2  | -32.8 |
| S12001    | -3.6  | 40.1  | -12.6 | -7.7  | 33.8  | -18.0 | -9.7  | 30.5  | -26.0 |
| S14007    | -5.6  | 7.4   | -15.2 | -14.2 | -0.9  | -21.7 | -16.7 | 1.3   | -29.7 |
| S15003    | -2.3  | 66.8  | -18.8 | -17.2 | 72.6  | -27.0 | -19.1 | 55.0  | -34.9 |
| S15006    | -3.4  | 80.9  | -14.5 | -10.4 | 73.6  | -21.3 | -13.4 | 57.8  | -28.8 |
| S15007    | 9.5   | 88.9  | -13.0 | -9.9  | 90.8  | -13.1 | -4.7  | 61.4  | -31.9 |
| S16008    | 10.1  | 36.9  | -11.5 | -6.6  | 24.0  | -11.1 | -4.3  | 17.2  | -28.2 |
| S16011    | 5.5   | 23.4  | -7.7  | -2.6  | 17.8  | -9.8  | -2.0  | 12.3  | -20.6 |
| S18002    | -4.3  | 45.9  | -13.2 | -10.0 | 36.3  | -23.2 | -17.9 | 23.7  | -32.7 |
| S18003    | -5.2  | 46.2  | -14.1 | -11.6 | 37.9  | -25.7 | -21.3 | 22.8  | -36.1 |
| S18006    | -5.9  | 44.8  | -14.3 | -12.9 | 36.6  | -26.9 | -22.4 | 20.8  | -37.5 |
| S18050    | -8.9  | 41.3  | -17.9 | -17.6 | 36.4  | -32.7 | -28.1 | 17.7  | -44.8 |
| S22006    | -7.9  | 33.8  | -14.3 | -15.5 | 31.6  | -27.8 | -24.0 | 14.4  | -38.4 |
| S22035    | -0.9  | 31.3  | -11.9 | -12.3 | 31.8  | -24.1 | -17.7 | 14.8  | -38.0 |
| S23002    | -3.8  | 61.5  | -14.4 | -5.1  | 45.6  | -26.0 | -20.1 | 29.8  | -36.2 |
| S24008    | -3.4  | 64.3  | -15.2 | -4.5  | 47.7  | -27.7 | -21.5 | 32.1  | -38.5 |
| S24030    | 7.4   | 30.6  | -10.9 | -8.4  | 21.6  | -11.4 | -10.9 | 13.0  | -28.5 |
| S25002    | 6.3   | 63.7  | -10.6 | -8.0  | 70.0  | -11.8 | -4.9  | 45.8  | -28.5 |
| S25006    | 4.8   | 18.0  | -10.1 | -5.3  | 5.2   | -13.6 | -6.6  | 9.2   | -25.8 |
| S25030    | 7.1   | 85.8  | -10.0 | -6.0  | 93.0  | -10.7 | -3.4  | 67.3  | -29.2 |
| S25034    | -3.1  | 19.1  | -15.3 | -9.5  | 8.4   | -20.5 | -12.2 | 7.6   | -29.6 |
| S26021    | -3.5  | 18.9  | -16.0 | -10.1 | 7.3   | -21.3 | -14.8 | 6.5   | -30.8 |
| S26058    | -6.7  | 5.8   | -16.2 | -14.1 | -3.3  | -21.6 | -19.3 | 0.7   | -31.9 |
| S27002    | 9.8   | 138.2 | -15.5 | -10.6 | 137.0 | -16.6 | -8.6  | 102.5 | -38.1 |
| S30007    | 3.3   | 26.4  | -10.9 | -6.0  | 18.5  | -13.6 | -8.1  | 16.2  | -28.0 |
| S32012    | -2.2  | 20.2  | -10.9 | -10.2 | 25.1  | -19.7 | -16.6 | 15.5  | -31.0 |
| S33001    | 3.6   | 23.3  | -6.7  | -3.8  | 20.3  | -22.2 | -11.7 | 20.7  | -30.9 |
| S34001    | 3.5   | 28.5  | -13.4 | -3.9  | 29.7  | -6.7  | -1.3  | 24.6  | -21.4 |
| S35002    | 3.2   | 21.1  | -9.7  | -0.9  | 24.7  | -10.0 | -4.1  | 23.2  | -21.6 |
| S35005    | 0.4   | 23.0  | -12.4 | -10.1 | 29.6  | -14.4 | -9.6  | 19.6  | -28.8 |
| S36015    | 8.0   | 37.8  | -9.0  | 8.6   | 44.5  | -17.6 | -3.1  | 33.8  | -28.2 |
| S36019    | 0.5   | 42.3  | -17.1 | -6.4  | 41.2  | -15.3 | -12.5 | 31.7  | -31.9 |
| S38001    | 0.8   | 15.3  | -10.7 | -4.0  | 7.2   | -14.6 | -17.7 | 6.6   | -27.4 |
| S39009    | 6.0   | 23.4  | -5.9  | -3.0  | 31.4  | -23.7 | -11.1 | 25.0  | -27.8 |

| SSP370    |       |      |       |       |      |       |       |      |       |
|-----------|-------|------|-------|-------|------|-------|-------|------|-------|
| JJA       |       |      |       |       |      |       |       |      |       |
| Catchment | 2020s |      |       | 2050s |      |       | 2080s |      |       |
|           | med   | upp  | low   | med   | upp  | low   | med   | upp  | low   |
| S06013    | -5.4  | 24.0 | -18.0 | -2.9  | 20.0 | -16.5 | -7.8  | 25.0 | -20.6 |
| S06014    | -5.7  | 19.7 | -18.5 | -4.3  | 16.1 | -18.0 | -9.3  | 20.0 | -22.2 |
| S07009    | -7.7  | 17.4 | -16.7 | -5.9  | 17.6 | -16.6 | -11.3 | 14.7 | -21.3 |
| S07012    | -8.7  | 17.1 | -18.6 | -5.7  | 17.3 | -17.9 | -12.6 | 15.8 | -23.4 |
| S12001    | -4.6  | 2.4  | -9.7  | -6.3  | 7.9  | -14.2 | -10.9 | 0.3  | -17.1 |
| S14007    | -4.6  | 20.3 | -19.7 | -1.8  | 18.8 | -21.2 | -11.9 | 20.3 | -17.1 |
| S15003    | -9.0  | 4.7  | -30.0 | -14.3 | 13.1 | -38.2 | -21.6 | -3.4 | -42.3 |
| S15006    | -2.4  | 10.7 | -22.9 | -7.0  | 16.5 | -29.5 | -12.7 | 12.4 | -30.6 |
| S15007    | -5.9  | 7.1  | -26.0 | -15.8 | 13.0 | -36.0 | -22.0 | 12.0 | -41.3 |
| S16008    | -6.5  | 1.6  | -27.0 | -17.0 | -2.4 | -33.5 | -21.7 | -2.4 | -35.8 |
| S16011    | -4.0  | 0.9  | -18.2 | -11.0 | -1.3 | -22.9 | -15.2 | -0.7 | -24.6 |
| S18002    | -3.2  | 9.1  | -20.3 | -11.7 | 6.1  | -25.7 | -16.4 | 4.5  | -27.7 |
| S18003    | -2.6  | 9.6  | -23.9 | -13.9 | 4.9  | -28.7 | -19.4 | 4.3  | -32.5 |
| S18006    | -3.0  | 8.7  | -24.8 | -15.0 | 4.3  | -29.3 | -20.8 | 3.4  | -34.1 |
| S18050    | -15.8 | 2.3  | -31.7 | -26.7 | -3.2 | -36.2 | -31.8 | -6.1 | -43.5 |
| S22006    | -11.4 | 1.9  | -29.0 | -21.9 | -3.8 | -32.4 | -27.8 | -4.1 | -39.1 |
| S22035    | -9.5  | -0.3 | -27.0 | -19.2 | -4.3 | -31.5 | -25.6 | -3.9 | -37.2 |
| S23002    | -4.1  | 17.1 | -24.5 | -12.5 | 11.6 | -31.3 | -17.2 | 6.9  | -32.6 |
| S24008    | -2.9  | 20.8 | -25.9 | -12.8 | 14.3 | -33.3 | -17.8 | 7.7  | -35.2 |
| S24030    | -8.3  | 0.1  | -27.9 | -19.0 | -7.7 | -32.2 | -24.6 | -3.9 | -38.7 |
| S25002    | -7.6  | 3.7  | -24.5 | -19.0 | 3.4  | -33.3 | -22.2 | 12.6 | -39.4 |
| S25006    | -3.7  | 14.9 | -18.6 | -5.7  | 16.0 | -19.7 | -12.3 | 17.7 | -18.0 |
| S25030    | -6.5  | 3.6  | -27.5 | -18.5 | -2.7 | -35.6 | -25.6 | 2.3  | -44.1 |
| S25034    | -3.5  | 17.6 | -21.2 | -6.9  | 20.3 | -22.7 | -13.9 | 23.4 | -19.1 |
| S26021    | -4.2  | 16.2 | -21.8 | -8.4  | 17.5 | -24.3 | -15.6 | 20.3 | -21.7 |
| S26058    | -9.0  | 11.0 | -22.4 | -9.3  | 11.4 | -25.1 | -18.2 | 8.9  | -24.0 |
| S27002    | -7.5  | 4.7  | -29.4 | -21.7 | 6.9  | -40.0 | -31.1 | 0.7  | -45.6 |
| S30007    | -9.8  | 12.1 | -22.6 | -12.3 | 6.2  | -25.4 | -17.8 | 8.7  | -26.3 |
| S32012    | -14.2 | 2.0  | -30.9 | -19.6 | -8.0 | -33.1 | -27.6 | -1.6 | -39.5 |
| S33001    | -14.3 | 2.6  | -29.1 | -20.0 | -7.9 | -33.9 | -27.1 | -0.4 | -40.8 |
| S34001    | -11.1 | 8.4  | -21.7 | -15.5 | 0.2  | -26.8 | -18.7 | 6.5  | -29.6 |
| S35002    | -14.3 | 3.6  | -27.4 | -16.3 | -6.0 | -30.2 | -24.9 | 0.8  | -37.1 |
| S35005    | -11.6 | 6.0  | -24.4 | -13.8 | 2.7  | -27.8 | -17.0 | 1.8  | -33.9 |
| S36015    | -15.1 | 16.6 | -31.1 | -12.2 | 8.7  | -33.8 | -12.3 | 10.0 | -39.2 |
| S36019    | -9.6  | 13.2 | -26.8 | -12.8 | 10.1 | -32.0 | -20.7 | 7.1  | -33.4 |
| S38001    | -16.0 | -8.2 | -35.0 | -20.5 | -9.1 | -38.8 | -30.6 | -3.9 | -44.9 |
| S39009    | -17.2 | -5.9 | -26.1 | -21.7 | -8.1 | -39.3 | -27.6 | -1.0 | -45.1 |

| SSP585    |       |      |       |       |      |       |       |      |       |
|-----------|-------|------|-------|-------|------|-------|-------|------|-------|
| JJA       |       |      |       |       |      |       |       |      |       |
| Catchment | 2020s |      |       | 2050s |      |       | 2080s |      |       |
|           | med   | upp  | low   | med   | upp  | low   | med   | upp  | low   |
| S06013    | 0.6   | 10.1 | -10.2 | 5.1   | 11.1 | -14.8 | -8.7  | 14.2 | -16.7 |
| S06014    | 0.6   | 10.8 | -11.4 | 4.4   | 12.3 | -16.7 | -10.9 | 12.8 | -19.5 |
| S07009    | -0.3  | 12.4 | -9.2  | -3.3  | 7.1  | -12.3 | -11.2 | 7.5  | -22.0 |
| S07012    | -1.0  | 12.9 | -10.7 | -3.4  | 9.4  | -14.7 | -10.6 | 8.5  | -24.0 |
| S12001    | -0.2  | 9.8  | -10.8 | -1.0  | 7.3  | -9.6  | -8.7  | 8.1  | -15.5 |
| S14007    | -0.4  | 12.7 | -9.2  | -2.1  | 7.4  | -10.5 | -10.8 | 9.1  | -17.9 |
| S15003    | -3.2  | 18.9 | -13.8 | 3.9   | 23.2 | -20.1 | -9.7  | 17.0 | -39.9 |
| S15006    | -1.3  | 18.6 | -9.2  | 3.4   | 9.7  | -12.9 | -8.5  | 10.4 | -25.0 |
| S15007    | -0.1  | 19.6 | -11.4 | 3.5   | 15.4 | -20.0 | -13.7 | 11.3 | -32.5 |
| S16008    | 0.0   | 16.3 | -11.8 | -0.3  | 13.9 | -17.6 | -15.6 | 8.0  | -33.7 |
| S16011    | -0.1  | 10.3 | -7.3  | -0.1  | 9.0  | -11.1 | -10.0 | 6.7  | -21.7 |
| S18002    | -0.4  | 20.7 | -10.5 | 4.0   | 12.9 | -15.5 | -9.1  | 9.4  | -26.6 |
| S18003    | -0.4  | 22.3 | -12.3 | -1.6  | 15.5 | -21.0 | -9.3  | 5.0  | -31.1 |
| S18006    | -0.6  | 21.6 | -13.4 | -1.9  | 15.0 | -21.9 | -10.2 | 4.5  | -32.4 |
| S18050    | -3.0  | 17.9 | -16.7 | -5.8  | 14.6 | -26.8 | -17.2 | 1.9  | -40.7 |
| S22006    | -2.6  | 14.9 | -13.5 | -4.3  | 14.1 | -22.5 | -15.9 | 1.5  | -35.1 |
| S22035    | -3.1  | 14.0 | -13.5 | -3.3  | 15.1 | -22.6 | -12.4 | 2.0  | -32.6 |
| S23002    | 5.6   | 27.5 | -11.4 | 0.5   | 24.8 | -16.2 | -5.3  | 17.4 | -29.8 |
| S24008    | 5.5   | 31.0 | -12.8 | 2.3   | 29.4 | -21.1 | -3.6  | 21.8 | -33.0 |
| S24030    | 1.5   | 17.4 | -12.2 | -0.5  | 16.2 | -20.4 | -16.6 | 3.5  | -35.0 |
| S25002    | 2.1   | 15.9 | -11.6 | 1.2   | 16.4 | -20.5 | -14.3 | 6.2  | -35.3 |
| S25006    | 0.2   | 14.4 | -4.0  | 0.6   | 6.5  | -10.0 | -10.3 | 6.7  | -18.2 |
| S25030    | 5.5   | 25.4 | -9.5  | 4.0   | 29.3 | -21.4 | -5.1  | 16.4 | -36.9 |
| S25034    | 2.8   | 18.9 | -5.3  | 1.5   | 10.4 | -10.6 | -9.4  | 9.8  | -21.3 |
| S26021    | 0.7   | 16.1 | -5.2  | -1.1  | 8.9  | -11.5 | -11.2 | 7.7  | -21.4 |
| S26058    | 1.1   | 9.8  | -5.3  | -3.4  | 8.6  | -13.7 | -12.4 | 7.9  | -21.1 |
| S27002    | 2.1   | 31.9 | -12.7 | 0.8   | 32.2 | -27.8 | -7.5  | 19.6 | -40.7 |
| S30007    | 2.9   | 22.7 | -8.8  | -0.3  | 19.4 | -16.1 | -4.8  | 12.4 | -27.1 |
| S32012    | -2.3  | 18.3 | -11.8 | -0.7  | 22.0 | -25.8 | -18.3 | 10.3 | -34.8 |
| S33001    | -1.1  | 21.0 | -12.2 | -5.5  | 9.8  | -23.8 | -23.6 | 11.5 | -34.1 |
| S34001    | 1.1   | 17.6 | -8.7  | 1.3   | 21.5 | -21.0 | -4.6  | 12.7 | -26.2 |
| S35002    | 0.7   | 18.0 | -10.9 | -0.4  | 8.6  | -24.0 | -17.1 | 13.4 | -35.0 |
| S35005    | -1.1  | 9.1  | -9.3  | -0.2  | 12.4 | -21.7 | -14.6 | 7.8  | -31.2 |
| S36015    | -2.3  | 24.9 | -12.6 | 3.7   | 18.3 | -29.1 | -20.6 | 21.3 | -40.7 |
| S36019    | 3.5   | 12.0 | -9.5  | 0.5   | 15.1 | -21.1 | -16.9 | 11.3 | -29.8 |
| S38001    | -0.3  | 12.3 | -11.6 | -3.8  | 8.6  | -26.6 | -20.8 | 3.5  | -37.0 |
| S39009    | 0.6   | 14.3 | -12.1 | -8.8  | 8.2  | -27.9 | -23.6 | 6.3  | -38.2 |

| SSP126<br>SON |       |      |       |       |      |       |       |      |       |
|---------------|-------|------|-------|-------|------|-------|-------|------|-------|
| Catchment     | 2020s |      |       | 2050s |      |       | 2080s |      |       |
|               | med   | upp  | low   | med   | upp  | low   | med   | upp  | low   |
| S06013        | 13.0  | 43.3 | -11.3 | 7.7   | 64.7 | -17.6 | 4.2   | 43.4 | -17.3 |
| S06014        | 11.0  | 36.2 | -10.6 | 5.0   | 54.3 | -17.5 | 2.0   | 36.2 | -17.8 |
| S07009        | 3.4   | 22.9 | -17.2 | -8.9  | 26.2 | -32.5 | -4.4  | 10.5 | -34.5 |
| S07012        | 2.8   | 21.4 | -15.6 | -8.5  | 23.9 | -30.1 | -3.8  | 9.6  | -31.9 |
| S12001        | 10.0  | 21.3 | -13.4 | -0.5  | 28.1 | -24.0 | 0.5   | 15.0 | -25.5 |
| S14007        | -9.1  | 25.3 | -17.0 | -12.6 | 18.9 | -31.9 | -14.7 | 8.6  | -33.5 |
| S15003        | 6.0   | 20.4 | -11.5 | -4.2  | 22.2 | -22.4 | 0.6   | 10.7 | -23.0 |
| S15006        | 9.0   | 30.3 | -13.2 | -1.7  | 39.7 | -25.8 | -1.1  | 25.7 | -27.0 |
| S15007        | 11.4  | 23.1 | -1.0  | 5.4   | 29.2 | -13.3 | 1.2   | 18.8 | -11.8 |
| S16008        | 7.9   | 17.7 | -0.8  | 1.8   | 16.9 | -13.6 | -2.5  | 10.6 | -11.7 |
| S16011        | 10.1  | 17.9 | 1.1   | 4.2   | 19.2 | -10.0 | 1.0   | 13.0 | -7.2  |
| S18002        | 3.3   | 23.8 | -9.3  | -3.5  | 31.8 | -22.1 | -10.1 | 25.6 | -22.3 |
| S18003        | 3.4   | 20.5 | -8.6  | -3.0  | 28.1 | -20.5 | -8.9  | 23.3 | -20.5 |
| S18006        | 3.1   | 19.5 | -8.7  | -3.2  | 26.9 | -20.5 | -9.0  | 22.5 | -20.8 |
| S18050        | 2.8   | 15.4 | -8.5  | -3.3  | 21.4 | -19.0 | -8.5  | 18.4 | -19.6 |
| S22006        | 3.6   | 15.8 | -7.0  | -1.6  | 22.5 | -16.7 | -6.4  | 19.8 | -16.7 |
| S22035        | 1.1   | 15.2 | -8.4  | -9.1  | 21.4 | -18.8 | -6.8  | 17.1 | -17.9 |
| S23002        | 5.8   | 29.4 | -11.2 | 4.1   | 39.4 | -26.2 | -1.4  | 32.0 | -26.0 |
| S24008        | 5.3   | 26.0 | -10.4 | 3.5   | 35.4 | -24.5 | -1.7  | 29.6 | -24.5 |
| S24030        | 5.8   | 15.8 | -1.1  | 2.3   | 14.2 | -11.8 | -2.4  | 8.5  | -9.8  |
| S25002        | 9.6   | 18.0 | -1.0  | 5.1   | 20.9 | -11.1 | 1.8   | 13.8 | -8.7  |
| S25006        | 6.5   | 20.8 | -0.9  | 2.8   | 19.8 | -16.1 | -3.2  | 10.4 | -14.7 |
| S25030        | 7.3   | 26.9 | -1.2  | 5.5   | 35.8 | -10.7 | 0.1   | 32.0 | -8.2  |
| S25034        | 2.1   | 20.5 | -16.2 | -10.3 | 18.2 | -29.9 | -8.0  | 7.5  | -32.0 |
| S26021        | 1.1   | 18.8 | -16.9 | -11.0 | 15.9 | -30.6 | -10.1 | 5.7  | -32.9 |
| S26058        | -9.3  | 19.5 | -16.1 | -13.5 | 13.7 | -29.8 | -16.7 | 6.1  | -32.5 |
| S27002        | 6.6   | 34.3 | -3.6  | 3.2   | 43.4 | -15.7 | -4.5  | 37.2 | -16.6 |
| S30007        | 8.6   | 18.8 | -1.1  | 5.0   | 25.5 | -12.4 | -2.0  | 21.4 | -11.0 |
| S32012        | 4.1   | 34.2 | -2.3  | 1.4   | 41.7 | -8.0  | 1.0   | 40.2 | -6.0  |
| S33001        | 5.1   | 48.5 | -2.3  | 1.9   | 56.4 | -6.5  | 2.7   | 56.2 | -4.3  |
| S34001        | 9.1   | 36.0 | -6.7  | 7.6   | 44.3 | -7.1  | 1.8   | 41.3 | -3.9  |
| S35002        | 6.6   | 37.1 | -3.5  | 4.9   | 45.1 | -4.0  | 2.2   | 44.3 | -2.4  |
| S35005        | 3.6   | 14.2 | -8.4  | -1.3  | 13.7 | -14.0 | -2.1  | 6.2  | -15.4 |
| S36015        | 4.8   | 14.7 | -9.7  | 0.0   | 18.1 | -15.4 | 2.5   | 11.9 | -16.5 |
| S36019        | 3.9   | 17.5 | -13.5 | -2.3  | 19.8 | -22.6 | -5.3  | 8.1  | -24.6 |
| S38001        | 3.9   | 9.2  | -3.2  | 2.8   | 8.8  | -5.0  | 2.1   | 5.6  | -2.9  |
| S39009        | 1.4   | 42.1 | -3.3  | -0.4  | 51.8 | -12.4 | 1.8   | 50.5 | -9.3  |

| SSP370<br>SON |       |      |       |       |      |       |       |      |       |
|---------------|-------|------|-------|-------|------|-------|-------|------|-------|
| Catchment     | 2020s |      |       | 2050s |      |       | 2080s |      |       |
|               | med   | upp  | low   | med   | upp  | low   | med   | upp  | low   |
| S06013        | 3.1   | 24.0 | -8.8  | 15.7  | 36.4 | 1.3   | 12.7  | 54.5 | -1.2  |
| S06014        | 1.9   | 20.9 | -9.3  | 13.1  | 30.8 | 0.2   | 10.4  | 43.0 | -2.6  |
| S07009        | -4.2  | 22.1 | -15.6 | 10.3  | 30.1 | -4.5  | 6.8   | 40.0 | -8.9  |
| S07012        | -3.8  | 20.7 | -14.1 | 9.5   | 27.8 | -3.8  | 6.6   | 36.8 | -8.0  |
| S12001        | -0.4  | 19.8 | -12.9 | 6.3   | 22.2 | -3.0  | 7.1   | 22.1 | -9.6  |
| S14007        | -4.4  | 25.6 | -17.5 | 15.1  | 37.9 | -3.0  | 10.9  | 47.6 | -7.1  |
| S15003        | -2.5  | 18.5 | -13.1 | 5.3   | 21.6 | -4.6  | 5.5   | 16.3 | -8.0  |
| S15006        | 0.0   | 20.5 | -15.9 | 3.8   | 22.7 | -4.9  | 7.8   | 15.7 | -11.2 |
| S15007        | -2.9  | 16.1 | -14.2 | 1.8   | 17.1 | -6.8  | 3.1   | 12.5 | -12.0 |
| S16008        | -9.2  | 16.2 | -21.8 | 0.6   | 20.7 | -11.7 | -1.5  | 17.1 | -15.2 |
| S16011        | -6.3  | 15.0 | -17.8 | 2.0   | 21.1 | -8.6  | 2.0   | 18.3 | -11.4 |
| S18002        | -5.9  | 15.9 | -20.7 | 2.4   | 23.0 | -7.8  | 0.3   | 18.9 | -14.3 |
| S18003        | -5.4  | 14.2 | -19.5 | 3.9   | 21.7 | -7.1  | 0.4   | 17.5 | -13.7 |
| S18006        | -5.6  | 13.2 | -19.5 | 3.5   | 20.7 | -7.3  | -0.4  | 16.6 | -13.9 |
| S18050        | -5.2  | 8.2  | -17.9 | 2.5   | 14.7 | -7.3  | -1.9  | 13.5 | -13.0 |
| S22006        | -3.4  | 8.9  | -15.6 | 4.0   | 15.3 | -5.7  | 0.9   | 14.7 | -11.4 |
| S22035        | -3.5  | 9.9  | -16.0 | 3.0   | 15.0 | -5.7  | 0.3   | 13.8 | -10.9 |
| S23002        | -7.5  | 19.7 | -24.8 | 2.7   | 28.9 | -9.8  | 0.4   | 23.6 | -17.8 |
| S24008        | -7.2  | 17.1 | -23.7 | 3.8   | 26.6 | -9.3  | -0.5  | 21.4 | -17.3 |
| S24030        | -7.2  | 13.4 | -18.2 | 1.3   | 17.7 | -8.7  | -1.2  | 14.4 | -12.9 |
| S25002        | -1.5  | 12.6 | -11.0 | 2.7   | 17.2 | -5.0  | -0.1  | 13.8 | -7.9  |
| S25006        | -0.8  | 19.5 | -15.8 | 10.4  | 30.0 | -1.0  | 9.5   | 36.9 | -6.8  |
| S25030        | -2.3  | 13.0 | -14.3 | 2.4   | 19.8 | -6.6  | -0.5  | 15.6 | -9.2  |
| S25034        | -3.0  | 19.0 | -15.9 | 9.8   | 28.7 | -2.3  | 8.0   | 33.6 | -7.7  |
| S26021        | -2.7  | 18.2 | -16.9 | 8.1   | 26.2 | -3.2  | 7.8   | 29.9 | -8.0  |
| S26058        | -5.8  | 17.9 | -17.0 | 6.9   | 26.0 | -5.1  | 3.7   | 29.4 | -9.8  |
| S27002        | -6.6  | 13.5 | -19.9 | -2.4  | 18.8 | -11.5 | -4.7  | 14.7 | -15.7 |
| S30007        | -4.0  | 13.7 | -15.5 | 10.0  | 28.3 | -6.8  | 5.3   | 27.9 | -11.3 |
| S32012        | -0.6  | 10.3 | -11.7 | 6.1   | 24.0 | -5.7  | 3.5   | 25.9 | -8.5  |
| S33001        | 0.3   | 9.7  | -11.7 | 6.9   | 25.5 | -5.6  | 4.1   | 29.9 | -8.5  |
| S34001        | -1.4  | 12.7 | -14.4 | 9.5   | 24.1 | -6.3  | 5.6   | 24.3 | -9.0  |
| S35002        | -1.2  | 12.2 | -11.9 | 9.1   | 24.8 | -5.3  | 6.3   | 27.6 | -8.3  |
| S35005        | -1.6  | 13.0 | -9.4  | 5.3   | 21.5 | -3.4  | 3.8   | 24.6 | -5.6  |
| S36015        | 0.1   | 16.0 | -9.5  | 7.9   | 28.4 | -3.0  | 5.6   | 34.3 | -3.8  |
| S36019        | -3.6  | 17.0 | -16.5 | 5.4   | 25.1 | -3.6  | 4.4   | 24.9 | -9.2  |
| S38001        | 1.9   | 10.7 | -7.8  | 3.1   | 22.3 | -5.0  | 2.3   | 23.9 | -5.6  |
| S39009        | -0.4  | 10.8 | -10.4 | 3.1   | 22.5 | -6.1  | 0.9   | 24.0 | -7.7  |

SSP585  
SON

| Catchment | 2020s |      |       | 2050s |      |      | 2080s |      |       |
|-----------|-------|------|-------|-------|------|------|-------|------|-------|
|           | med   | upp  | low   | med   | upp  | low  | med   | upp  | low   |
| S06013    | 17.8  | 31.2 | -7.4  | 11.1  | 34.1 | 0.5  | 10.9  | 30.9 | -3.5  |
| S06014    | 15.2  | 26.8 | -8.0  | 8.7   | 30.2 | -1.1 | 7.2   | 27.4 | -4.9  |
| S07009    | 14.4  | 23.5 | -9.0  | 6.7   | 25.4 | -3.9 | -1.0  | 23.4 | -12.5 |
| S07012    | 13.7  | 22.5 | -8.3  | 6.7   | 24.1 | -3.3 | -0.3  | 22.5 | -11.3 |
| S12001    | 14.0  | 26.1 | -9.7  | 8.3   | 27.9 | -0.6 | 3.4   | 25.6 | -5.7  |
| S14007    | 14.9  | 21.3 | -10.1 | 6.8   | 23.9 | -3.3 | -1.8  | 23.1 | -11.0 |
| S15003    | 10.9  | 21.9 | -6.3  | 7.0   | 24.6 | -2.1 | 1.3   | 23.3 | -10.5 |
| S15006    | 12.8  | 21.8 | -8.1  | 6.1   | 24.2 | -4.5 | -0.4  | 22.3 | -12.6 |
| S15007    | 10.7  | 18.9 | -6.3  | 5.2   | 19.8 | -2.0 | -2.2  | 18.4 | -9.3  |
| S16008    | 5.8   | 19.7 | -7.7  | 4.0   | 21.1 | -7.2 | -2.2  | 19.6 | -14.7 |
| S16011    | 6.6   | 20.5 | -6.2  | 5.1   | 22.6 | -5.5 | 0.7   | 20.8 | -10.5 |
| S18002    | 7.1   | 13.9 | 0.4   | 5.0   | 17.5 | -4.9 | 5.8   | 13.3 | -12.5 |
| S18003    | 5.4   | 12.4 | -1.9  | 3.0   | 15.1 | -3.9 | 1.7   | 9.7  | -11.5 |
| S18006    | 5.0   | 11.3 | -1.8  | 2.8   | 13.9 | -4.2 | 1.4   | 8.9  | -11.8 |
| S18050    | 4.6   | 8.7  | -1.4  | 2.3   | 10.7 | -4.2 | 1.2   | 7.2  | -11.7 |
| S22006    | 5.2   | 9.4  | -0.2  | 3.2   | 12.3 | -3.3 | 3.2   | 9.5  | -9.6  |
| S22035    | 4.7   | 10.4 | -2.3  | 2.7   | 13.1 | -3.0 | 0.9   | 9.4  | -10.4 |
| S23002    | 6.4   | 27.6 | -2.4  | 4.4   | 33.1 | -6.3 | 0.8   | 30.8 | -14.2 |
| S24008    | 5.6   | 24.6 | 0.4   | 3.7   | 29.0 | -5.4 | 2.4   | 27.4 | -13.7 |
| S24030    | 4.8   | 16.2 | -2.1  | 3.3   | 17.2 | -5.0 | -0.1  | 16.9 | -12.6 |
| S25002    | 6.6   | 15.3 | -1.5  | 4.2   | 16.3 | -2.7 | 0.7   | 16.6 | -11.9 |
| S25006    | 13.3  | 20.3 | -5.3  | 6.2   | 21.7 | -3.9 | -0.4  | 19.8 | -11.0 |
| S25030    | 5.5   | 19.3 | -2.1  | 5.5   | 22.5 | -0.9 | 0.9   | 22.9 | -7.2  |
| S25034    | 13.3  | 23.1 | -6.5  | 6.6   | 24.5 | -3.6 | -0.8  | 23.1 | -11.9 |
| S26021    | 12.2  | 20.6 | -6.9  | 5.2   | 21.6 | -4.8 | -2.6  | 20.0 | -12.6 |
| S26058    | 8.8   | 21.1 | -8.7  | 4.9   | 21.6 | -5.3 | -2.0  | 19.8 | -14.5 |
| S27002    | 6.6   | 22.4 | -2.9  | 3.0   | 24.3 | -5.1 | -4.0  | 23.6 | -13.4 |
| S30007    | 6.2   | 22.2 | -2.2  | 5.1   | 24.8 | -2.4 | 0.4   | 24.5 | -9.8  |
| S32012    | 7.6   | 16.7 | 0.5   | 6.3   | 19.2 | -0.4 | 2.7   | 20.6 | -3.7  |
| S33001    | 7.6   | 13.7 | -5.9  | 6.6   | 15.8 | -6.5 | 3.4   | 22.9 | -13.6 |
| S34001    | 9.4   | 19.7 | -2.6  | 5.0   | 22.5 | -2.7 | 3.0   | 22.5 | -7.4  |
| S35002    | 7.2   | 13.8 | -0.8  | 5.5   | 14.1 | -0.9 | 3.4   | 22.6 | -4.9  |
| S35005    | 9.2   | 14.0 | -4.5  | 3.9   | 15.4 | -1.3 | 2.6   | 15.5 | -9.6  |
| S36015    | 13.1  | 18.3 | -4.9  | 7.1   | 25.3 | -0.3 | 4.4   | 28.6 | -8.8  |
| S36019    | 11.3  | 21.4 | -9.9  | 3.3   | 23.4 | -6.4 | 0.0   | 19.6 | -16.6 |
| S38001    | 7.1   | 9.8  | -3.1  | 5.1   | 14.0 | -2.1 | 2.3   | 18.1 | -6.4  |
| S39009    | 6.7   | 11.8 | -4.0  | 6.0   | 17.1 | -1.6 | 5.4   | 20.6 | -7.1  |

**Table S3 Median and 90 percent confidence interval of projected changes (percent) in seasonal flows simulated for each catchment using the GR4J hydrological model for each future time period and SSP.**

| Catchment | SSP126 |      |       |       |      |       |       |      |       |
|-----------|--------|------|-------|-------|------|-------|-------|------|-------|
|           | DJF    |      |       |       |      |       |       |      |       |
|           | 2020s  |      |       | 2050s |      |       | 2080s |      |       |
|           | med    | upp  | low   | med   | upp  | low   | med   | upp  | low   |
| S06013    | 3.0    | 12.9 | -7.0  | 1.7   | 18.9 | -4.0  | 5.4   | 18.3 | -5.4  |
| S06014    | 2.6    | 12.4 | -7.1  | 1.5   | 18.1 | -4.2  | 5.0   | 17.6 | -5.5  |
| S07009    | 3.6    | 11.1 | -5.2  | 3.4   | 12.8 | -2.1  | 5.6   | 13.9 | -0.1  |
| S07012    | 3.4    | 10.7 | -5.2  | 3.1   | 12.2 | -2.2  | 5.3   | 13.3 | -0.2  |
| S12001    | 4.6    | 13.4 | -5.7  | 6.3   | 13.8 | 0.3   | 9.2   | 18.1 | 2.7   |
| S14007    | 1.9    | 9.8  | -7.8  | 3.6   | 7.1  | -0.9  | 5.5   | 10.5 | 0.3   |
| S15003    | 2.8    | 10.2 | -5.8  | 3.6   | 8.7  | -0.7  | 7.1   | 11.4 | 0.5   |
| S15006    | 2.2    | 12.0 | -5.7  | 3.2   | 13.6 | -1.1  | 7.0   | 15.8 | 0.0   |
| S15007    | 1.2    | 21.9 | -9.7  | 1.2   | 28.7 | -11.2 | 3.3   | 29.5 | -8.9  |
| S16008    | 2.9    | 11.1 | -6.3  | 4.0   | 14.2 | -4.0  | 7.0   | 15.1 | -2.3  |
| S16011    | 3.2    | 11.0 | -5.4  | 5.2   | 14.3 | -3.1  | 7.9   | 16.2 | -1.1  |
| S18002    | 2.5    | 13.4 | -6.6  | 4.0   | 17.9 | -3.4  | 6.6   | 17.6 | -1.5  |
| S18003    | 2.1    | 13.2 | -6.6  | 3.3   | 17.7 | -3.3  | 5.5   | 17.4 | -1.3  |
| S18006    | 2.1    | 13.1 | -6.5  | 3.2   | 17.5 | -3.3  | 5.4   | 17.2 | -1.3  |
| S18050    | 2.0    | 12.8 | -6.4  | 2.7   | 17.0 | -3.2  | 5.4   | 16.5 | -1.0  |
| S22006    | 2.2    | 13.5 | -6.3  | 3.2   | 18.1 | -2.9  | 6.3   | 17.7 | -0.3  |
| S22035    | 2.2    | 13.6 | -5.9  | 3.3   | 18.3 | -4.0  | 4.7   | 17.9 | -0.5  |
| S23002    | 2.2    | 12.4 | -6.5  | 2.5   | 16.4 | -3.0  | 4.9   | 15.8 | -0.7  |
| S24008    | 2.4    | 13.8 | -7.0  | 3.9   | 18.6 | -4.0  | 6.2   | 18.7 | -1.6  |
| S24030    | 2.8    | 13.8 | -6.8  | 3.8   | 18.6 | -3.6  | 5.7   | 18.6 | -0.9  |
| S25002    | 2.7    | 12.3 | -6.4  | 4.0   | 14.0 | -4.1  | 8.0   | 17.0 | -1.6  |
| S25006    | 4.6    | 11.0 | -9.6  | 4.3   | 11.8 | -2.9  | 7.4   | 16.6 | -0.7  |
| S25030    | 2.5    | 13.1 | -5.8  | 2.7   | 17.9 | -2.2  | 4.5   | 20.5 | -2.1  |
| S25034    | 3.0    | 8.7  | -7.8  | 2.9   | 9.3  | -2.3  | 4.8   | 12.4 | 0.1   |
| S26021    | 2.8    | 8.3  | -7.7  | 2.7   | 8.5  | -2.4  | 4.3   | 11.7 | -0.3  |
| S26058    | 1.2    | 8.4  | -7.6  | 1.9   | 6.4  | -2.4  | 3.6   | 9.0  | -0.3  |
| S27002    | 3.6    | 15.9 | -7.2  | 3.8   | 21.4 | -2.8  | 6.4   | 25.2 | -2.8  |
| S30007    | 2.3    | 10.9 | -8.6  | 1.3   | 14.9 | -2.7  | 3.4   | 16.6 | -2.7  |
| S32012    | 1.3    | 16.8 | -9.6  | 1.0   | 22.5 | -7.3  | 2.6   | 24.7 | -6.2  |
| S33001    | 1.2    | 21.9 | -9.7  | 1.2   | 28.7 | -11.2 | 3.3   | 29.5 | -8.9  |
| S34001    | 1.1    | 16.9 | -10.6 | 0.8   | 22.4 | -6.4  | 2.2   | 24.6 | -5.9  |
| S35002    | 1.1    | 17.0 | -10.6 | 1.2   | 22.8 | -9.7  | 3.2   | 25.3 | -10.1 |
| S35005    | 1.0    | 5.4  | -9.1  | 1.2   | 6.2  | -4.6  | 3.6   | 8.0  | -5.5  |
| S36015    | 1.3    | 8.8  | -9.7  | 1.2   | 7.8  | -7.0  | 4.4   | 10.0 | -8.4  |
| S36019    | 2.2    | 7.8  | -11.2 | 2.5   | 9.2  | -5.5  | 4.7   | 11.7 | -7.2  |
| S38001    | 1.9    | 5.6  | -10.3 | -0.7  | 8.1  | -8.5  | 4.0   | 9.2  | -8.8  |
| S39009    | 1.9    | 18.4 | -8.2  | 1.0   | 25.1 | -9.1  | 4.5   | 24.9 | -8.4  |

| SSP370    |       |      |      |       |      |       |       |      |      |
|-----------|-------|------|------|-------|------|-------|-------|------|------|
| DJF       |       |      |      |       |      |       |       |      |      |
| Catchment | 2020s |      |      | 2050s |      |       | 2080s |      |      |
|           | med   | upp  | low  | med   | upp  | low   | med   | upp  | low  |
| S06013    | 3.0   | 14.8 | -4.9 | 6.0   | 26.6 | -6.7  | 7.0   | 27.6 | -2.1 |
| S06014    | 2.7   | 14.1 | -4.7 | 5.4   | 25.7 | -6.7  | 6.7   | 26.6 | -2.0 |
| S07009    | 2.3   | 12.9 | -3.4 | 4.9   | 19.8 | -2.7  | 8.0   | 19.3 | 0.9  |
| S07012    | 2.1   | 12.3 | -3.4 | 4.6   | 19.1 | -2.7  | 7.7   | 18.5 | 0.9  |
| S12001    | 5.6   | 16.3 | -3.2 | 9.0   | 18.3 | -0.8  | 13.1  | 24.2 | 6.6  |
| S14007    | 2.7   | 10.7 | -6.5 | 5.7   | 11.3 | -1.3  | 8.0   | 14.4 | 3.3  |
| S15003    | 2.7   | 10.5 | -3.1 | 5.6   | 12.1 | -1.0  | 8.5   | 12.7 | 3.6  |
| S15006    | 2.6   | 13.1 | -3.3 | 5.0   | 18.0 | -1.3  | 7.7   | 17.1 | 3.0  |
| S15007    | 2.8   | 26.2 | -9.9 | 3.2   | 35.6 | -12.0 | 5.6   | 38.4 | -7.3 |
| S16008    | 3.0   | 16.8 | -3.6 | 4.4   | 19.3 | -2.9  | 9.6   | 16.6 | 1.5  |
| S16011    | 2.9   | 17.0 | -3.1 | 5.1   | 20.1 | -2.4  | 9.3   | 17.2 | 1.8  |
| S18002    | 4.1   | 18.5 | -4.4 | 4.9   | 23.7 | -1.7  | 7.1   | 19.3 | 2.1  |
| S18003    | 2.8   | 18.3 | -4.2 | 4.4   | 23.4 | -1.5  | 7.1   | 19.1 | 2.2  |
| S18006    | 2.8   | 18.2 | -4.2 | 4.3   | 23.1 | -1.5  | 7.1   | 18.9 | 2.2  |
| S18050    | 2.7   | 17.7 | -3.9 | 4.2   | 22.4 | -1.3  | 7.4   | 18.3 | 1.5  |
| S22006    | 3.0   | 18.7 | -3.8 | 4.7   | 23.6 | -1.0  | 8.4   | 19.4 | 2.0  |
| S22035    | 3.1   | 18.8 | -2.9 | 5.4   | 23.9 | -2.2  | 8.1   | 19.7 | 1.1  |
| S23002    | 2.4   | 17.3 | -4.2 | 4.5   | 21.9 | -2.3  | 6.8   | 17.7 | 1.1  |
| S24008    | 2.6   | 19.1 | -5.2 | 4.8   | 24.7 | -2.4  | 6.4   | 19.9 | 0.7  |
| S24030    | 3.2   | 19.0 | -4.8 | 5.0   | 24.6 | -2.1  | 7.1   | 19.9 | 1.6  |
| S25002    | 2.7   | 13.3 | -3.2 | 5.3   | 18.7 | -2.3  | 8.9   | 17.1 | 1.6  |
| S25006    | 3.6   | 12.7 | -6.2 | 6.5   | 19.7 | -3.3  | 8.6   | 20.8 | -0.8 |
| S25030    | 2.7   | 16.8 | -3.2 | 4.3   | 25.7 | -2.6  | 6.6   | 22.1 | 1.5  |
| S25034    | 2.2   | 10.3 | -6.4 | 5.0   | 15.0 | -2.4  | 7.6   | 15.5 | 1.0  |
| S26021    | 1.9   | 9.6  | -6.3 | 4.2   | 14.1 | -2.6  | 6.7   | 14.1 | 0.5  |
| S26058    | 1.7   | 9.4  | -6.2 | 4.2   | 9.9  | -2.5  | 6.3   | 12.0 | 0.7  |
| S27002    | 4.5   | 20.5 | -4.3 | 6.0   | 31.7 | -3.0  | 8.7   | 28.6 | 2.9  |
| S30007    | 2.0   | 13.5 | -5.3 | 4.3   | 21.7 | -3.9  | 5.5   | 19.1 | -1.4 |
| S32012    | 2.7   | 19.4 | -4.5 | 3.5   | 29.4 | -6.5  | 5.7   | 31.3 | -1.7 |
| S33001    | 2.8   | 26.2 | -9.9 | 3.2   | 35.6 | -12.0 | 5.6   | 38.4 | -7.3 |
| S34001    | 2.7   | 19.4 | -6.7 | 3.6   | 29.2 | -8.0  | 5.3   | 30.9 | -4.2 |
| S35002    | 2.6   | 19.6 | -9.0 | 3.3   | 29.6 | -11.2 | 1.8   | 31.4 | -3.7 |
| S35005    | 1.3   | 6.6  | -7.2 | 1.7   | 11.1 | -6.4  | 3.9   | 11.9 | -1.3 |
| S36015    | 2.7   | 7.8  | -9.3 | 5.0   | 13.4 | -7.6  | 4.7   | 15.0 | -1.6 |
| S36019    | 2.4   | 9.7  | -9.0 | 3.2   | 14.9 | -8.5  | 6.8   | 18.4 | -1.7 |
| S38001    | 2.7   | 6.8  | -7.6 | 4.2   | 11.5 | -9.1  | 3.6   | 13.5 | -3.5 |
| S39009    | 2.6   | 21.1 | -7.5 | 5.2   | 29.6 | -9.1  | 7.0   | 34.7 | -1.1 |



| SSP585    |       |      |       |       |      |       |       |      |      |
|-----------|-------|------|-------|-------|------|-------|-------|------|------|
| DJF       |       |      |       |       |      |       |       |      |      |
| Catchment | 2020s |      |       | 2050s |      |       | 2080s |      |      |
|           | med   | upp  | low   | med   | upp  | low   | med   | upp  | low  |
| S06013    | 3.4   | 20.1 | -3.5  | 6.4   | 26.0 | -6.7  | 8.5   | 33.3 | 1.3  |
| S06014    | 3.1   | 19.5 | -3.6  | 6.2   | 25.1 | -6.6  | 8.3   | 32.1 | 1.2  |
| S07009    | 4.1   | 14.6 | -1.6  | 5.6   | 19.2 | -1.9  | 8.3   | 25.5 | 3.5  |
| S07012    | 3.9   | 14.0 | -1.7  | 5.3   | 18.5 | -1.9  | 8.0   | 24.4 | 3.3  |
| S12001    | 6.7   | 17.8 | -0.6  | 9.0   | 23.2 | -0.2  | 14.4  | 29.1 | 8.2  |
| S14007    | 3.6   | 11.6 | -3.8  | 6.4   | 11.0 | -1.3  | 8.7   | 20.6 | 4.9  |
| S15003    | 3.8   | 12.4 | -1.6  | 6.0   | 12.9 | -0.8  | 9.2   | 17.7 | 5.5  |
| S15006    | 3.8   | 16.9 | -1.7  | 5.5   | 17.9 | -1.4  | 8.2   | 22.0 | 4.5  |
| S15007    | 2.8   | 30.0 | -12.2 | 4.5   | 36.6 | -8.6  | 6.2   | 36.4 | -6.0 |
| S16008    | 4.0   | 17.9 | -3.9  | 6.6   | 19.0 | -4.1  | 10.0  | 22.9 | 4.4  |
| S16011    | 3.9   | 17.5 | -2.9  | 6.5   | 19.1 | -3.7  | 9.6   | 22.3 | 4.8  |
| S18002    | 3.5   | 20.3 | -4.6  | 7.0   | 21.3 | -2.0  | 8.6   | 24.6 | 1.8  |
| S18003    | 3.4   | 20.1 | -4.6  | 6.0   | 21.0 | -1.8  | 8.7   | 24.3 | 2.1  |
| S18006    | 3.4   | 19.9 | -4.6  | 5.9   | 20.8 | -1.8  | 8.7   | 24.0 | 2.1  |
| S18050    | 3.5   | 19.6 | -4.5  | 5.3   | 20.2 | -1.5  | 8.8   | 23.2 | 1.0  |
| S22006    | 3.7   | 20.6 | -4.3  | 6.0   | 21.2 | -1.0  | 9.7   | 25.0 | 1.1  |
| S22035    | 5.8   | 20.8 | -4.0  | 6.2   | 21.4 | -1.8  | 9.3   | 25.1 | 1.3  |
| S23002    | 3.1   | 19.0 | -4.5  | 4.5   | 19.7 | -2.1  | 8.2   | 22.1 | 2.4  |
| S24008    | 3.7   | 20.4 | -4.6  | 5.7   | 22.0 | -3.7  | 7.0   | 24.8 | 2.3  |
| S24030    | 3.7   | 20.6 | -4.5  | 6.0   | 21.9 | -3.0  | 8.1   | 25.0 | 3.2  |
| S25002    | 5.0   | 18.8 | -3.9  | 7.1   | 18.5 | -4.1  | 9.4   | 24.3 | 4.9  |
| S25006    | 3.9   | 15.9 | -4.7  | 6.7   | 18.1 | -4.1  | 8.9   | 26.2 | 5.0  |
| S25030    | 3.8   | 21.9 | -4.7  | 6.2   | 23.3 | -3.7  | 7.0   | 26.1 | 3.6  |
| S25034    | 2.5   | 13.9 | -4.0  | 5.7   | 14.5 | -1.3  | 7.8   | 20.7 | 4.1  |
| S26021    | 2.3   | 13.1 | -4.1  | 5.1   | 13.5 | -1.7  | 6.8   | 18.8 | 3.4  |
| S26058    | 2.3   | 10.6 | -4.1  | 4.8   | 9.8  | -1.7  | 7.4   | 17.4 | 3.5  |
| S27002    | 5.4   | 27.1 | -6.0  | 8.4   | 29.1 | -3.4  | 8.8   | 32.6 | 5.2  |
| S30007    | 3.3   | 18.0 | -5.6  | 5.0   | 19.2 | -4.2  | 5.1   | 22.6 | 2.5  |
| S32012    | 2.6   | 24.4 | -5.9  | 4.2   | 29.5 | -6.7  | 6.6   | 30.4 | -0.1 |
| S33001    | 2.8   | 30.0 | -12.2 | 4.5   | 36.6 | -8.6  | 6.2   | 36.4 | -6.0 |
| S34001    | 2.7   | 24.4 | -6.9  | 4.1   | 29.4 | -10.7 | 3.6   | 30.1 | -5.1 |
| S35002    | 2.8   | 24.8 | -11.4 | 4.8   | 29.7 | -10.4 | 4.0   | 30.8 | -5.5 |
| S35005    | 1.9   | 10.7 | -6.1  | 4.0   | 11.5 | -6.2  | 5.3   | 14.8 | -0.2 |
| S36015    | 2.6   | 13.0 | -9.8  | 5.4   | 13.8 | -6.3  | 5.8   | 18.9 | 0.9  |
| S36019    | 3.0   | 15.6 | -6.8  | 6.9   | 16.8 | -7.3  | 8.4   | 23.2 | 1.5  |
| S38001    | 2.0   | 11.8 | -10.1 | 5.2   | 12.5 | -10.2 | 3.6   | 15.8 | -4.3 |
| S39009    | 3.1   | 29.0 | -7.5  | 5.2   | 33.3 | -6.3  | 7.1   | 32.1 | 0.2  |

| SSP126    |       |      |       |       |      |       |       |      |       |
|-----------|-------|------|-------|-------|------|-------|-------|------|-------|
| MAM       |       |      |       |       |      |       |       |      |       |
| Catchment | 2020s |      |       | 2050s |      |       | 2080s |      |       |
|           | med   | upp  | low   | med   | upp  | low   | med   | upp  | low   |
| S06013    | -4.9  | 11.2 | -14.0 | -7.0  | 3.8  | -14.4 | -9.8  | 1.1  | -19.3 |
| S06014    | -4.7  | 11.2 | -13.8 | -6.8  | 4.1  | -13.9 | -9.5  | 1.3  | -18.8 |
| S07009    | -5.2  | 8.3  | -10.8 | -6.5  | -0.7 | -15.6 | -11.6 | -2.8 | -19.3 |
| S07012    | -5.2  | 8.1  | -10.7 | -6.5  | -0.8 | -15.5 | -11.5 | -2.9 | -19.2 |
| S12001    | -4.7  | 14.0 | -13.9 | -4.3  | 2.7  | -14.7 | -8.4  | -0.7 | -17.4 |
| S14007    | -5.4  | 5.0  | -14.8 | -7.9  | 0.1  | -16.4 | -12.7 | -1.6 | -19.9 |
| S15003    | -5.1  | 11.6 | -12.2 | -5.1  | 1.2  | -13.5 | -9.6  | -0.3 | -17.0 |
| S15006    | -5.4  | 16.0 | -12.8 | -4.3  | 4.5  | -14.4 | -9.6  | -0.2 | -17.9 |
| S15007    | -4.3  | 15.4 | -15.5 | -6.0  | 10.6 | -22.8 | -13.8 | 14.1 | -19.6 |
| S16008    | -6.0  | 8.8  | -16.7 | -8.3  | 0.9  | -17.3 | -14.5 | -1.1 | -20.7 |
| S16011    | -5.0  | 8.5  | -14.5 | -6.1  | 1.2  | -14.5 | -11.4 | -0.4 | -17.2 |
| S18002    | -2.9  | 13.7 | -13.5 | -4.4  | 3.4  | -15.1 | -8.7  | -1.0 | -15.5 |
| S18003    | -2.9  | 13.3 | -13.0 | -4.0  | 3.3  | -14.5 | -8.2  | -0.7 | -15.0 |
| S18006    | -3.0  | 13.1 | -12.9 | -3.9  | 3.2  | -14.4 | -8.1  | -0.7 | -14.9 |
| S18050    | -3.1  | 12.8 | -12.6 | -5.2  | 3.1  | -13.7 | -8.4  | 0.1  | -14.6 |
| S22006    | -2.4  | 14.9 | -13.1 | -4.5  | 5.1  | -13.0 | -7.1  | 1.8  | -13.6 |
| S22035    | -3.0  | 15.3 | -13.6 | -4.3  | 5.4  | -15.5 | -6.5  | 2.1  | -15.7 |
| S23002    | -5.1  | 12.1 | -10.1 | -5.9  | 2.3  | -13.0 | -9.9  | -1.3 | -13.5 |
| S24008    | -6.0  | 12.2 | -11.2 | -6.5  | 1.4  | -16.1 | -11.6 | -3.7 | -16.2 |
| S24030    | -5.8  | 12.3 | -10.7 | -5.9  | 1.7  | -15.4 | -10.7 | -3.5 | -15.3 |
| S25002    | -6.0  | 18.3 | -15.3 | -3.7  | 6.6  | -15.6 | -9.2  | 0.5  | -20.6 |
| S25006    | -5.9  | 10.5 | -19.2 | -5.8  | -0.6 | -19.3 | -8.3  | -2.6 | -21.9 |
| S25030    | -6.5  | 17.9 | -11.6 | -4.0  | 6.9  | -13.5 | -9.2  | 2.3  | -16.4 |
| S25034    | -4.7  | 9.5  | -14.5 | -5.3  | 0.1  | -16.4 | -8.1  | -1.8 | -19.8 |
| S26021    | -5.1  | 8.6  | -14.6 | -6.0  | -0.4 | -16.8 | -8.4  | -2.5 | -20.1 |
| S26058    | -5.0  | 3.7  | -14.5 | -6.6  | -0.2 | -16.7 | -12.1 | -2.2 | -19.8 |
| S27002    | -8.4  | 24.4 | -16.1 | -5.3  | 9.7  | -17.1 | -10.7 | 3.9  | -20.4 |
| S30007    | -4.6  | 12.1 | -15.4 | -4.2  | 1.6  | -16.4 | -8.6  | 0.9  | -18.8 |
| S32012    | -5.1  | 13.9 | -15.1 | -5.2  | 7.5  | -18.8 | -7.9  | 10.9 | -19.3 |
| S33001    | -4.3  | 15.4 | -15.5 | -6.0  | 10.6 | -22.8 | -13.8 | 14.1 | -19.6 |
| S34001    | -4.7  | 12.3 | -15.2 | -5.2  | 5.3  | -15.5 | -6.7  | 7.8  | -17.8 |
| S35002    | -2.8  | 13.5 | -14.1 | -4.8  | 6.7  | -14.0 | -9.1  | 9.9  | -17.2 |
| S35005    | -4.3  | 7.1  | -14.2 | -4.8  | 0.7  | -13.4 | -8.5  | -1.2 | -18.6 |
| S36015    | -3.3  | 6.0  | -15.8 | -7.1  | -1.6 | -14.7 | -12.9 | -2.0 | -19.3 |
| S36019    | -6.7  | 6.8  | -20.6 | -8.2  | 0.0  | -19.8 | -12.6 | -2.4 | -24.6 |
| S38001    | -3.6  | 6.3  | -13.5 | -5.6  | 1.2  | -13.3 | -9.7  | 0.6  | -16.0 |
| S39009    | -3.8  | 11.2 | -13.8 | -6.0  | 7.3  | -16.3 | -7.9  | 9.3  | -18.5 |

| SSP370    |       |      |       |       |      |       |       |      |       |
|-----------|-------|------|-------|-------|------|-------|-------|------|-------|
| MAM       |       |      |       |       |      |       |       |      |       |
| Catchment | 2020s |      |       | 2050s |      |       | 2080s |      |       |
|           | med   | upp  | low   | med   | upp  | low   | med   | upp  | low   |
| S06013    | -3.3  | 12.6 | -10.5 | -6.4  | 3.1  | -13.9 | -7.4  | 7.3  | -21.8 |
| S06014    | -3.2  | 12.5 | -10.3 | -6.1  | 3.4  | -13.6 | -7.1  | 7.6  | -21.3 |
| S07009    | -2.5  | 7.9  | -10.8 | -6.7  | 2.7  | -14.7 | -8.2  | 3.3  | -21.4 |
| S07012    | -2.4  | 7.6  | -10.8 | -6.7  | 2.6  | -14.6 | -8.2  | 2.9  | -21.2 |
| S12001    | -2.9  | 12.6 | -10.1 | -3.8  | 6.4  | -12.9 | -2.6  | 12.9 | -21.1 |
| S14007    | -4.5  | 7.8  | -12.4 | -6.8  | 2.8  | -17.6 | -6.8  | 1.8  | -22.9 |
| S15003    | -3.5  | 10.4 | -9.5  | -4.5  | 4.6  | -12.7 | -5.1  | 3.5  | -19.9 |
| S15006    | -4.3  | 14.7 | -10.2 | -4.4  | 4.2  | -12.7 | -4.4  | 4.8  | -21.2 |
| S15007    | -0.1  | 13.6 | -12.0 | -6.6  | 9.0  | -14.0 | -6.1  | 12.4 | -20.0 |
| S16008    | -5.0  | 10.2 | -11.6 | -7.3  | 4.0  | -15.7 | -10.0 | 1.6  | -26.1 |
| S16011    | -3.9  | 9.4  | -9.4  | -6.0  | 4.9  | -12.5 | -7.4  | 3.0  | -21.3 |
| S18002    | -1.6  | 16.6 | -11.1 | -4.4  | 8.3  | -11.6 | -4.7  | 3.4  | -16.2 |
| S18003    | -1.3  | 16.3 | -10.9 | -4.1  | 8.2  | -11.1 | -4.6  | 3.7  | -15.5 |
| S18006    | -1.2  | 16.1 | -10.9 | -4.1  | 8.1  | -11.0 | -4.7  | 3.6  | -15.5 |
| S18050    | -1.8  | 15.7 | -10.6 | -3.7  | 8.6  | -10.7 | -4.2  | 4.4  | -16.6 |
| S22006    | -1.6  | 17.5 | -10.5 | -2.8  | 10.0 | -10.2 | -3.6  | 5.6  | -16.2 |
| S22035    | -0.6  | 17.7 | -11.4 | -4.0  | 10.4 | -10.1 | -3.7  | 6.3  | -15.8 |
| S23002    | -2.3  | 11.0 | -10.1 | -4.5  | 2.9  | -10.6 | -5.4  | 1.4  | -16.2 |
| S24008    | -3.4  | 10.9 | -11.5 | -5.6  | 0.8  | -13.4 | -7.2  | -1.6 | -19.0 |
| S24030    | -2.9  | 11.0 | -11.8 | -5.0  | 1.4  | -12.5 | -6.7  | -0.8 | -17.9 |
| S25002    | -3.8  | 17.1 | -12.2 | -6.5  | 5.8  | -13.7 | -7.3  | 7.1  | -23.6 |
| S25006    | -2.6  | 8.5  | -14.4 | -8.3  | 2.6  | -14.4 | -8.4  | 2.9  | -21.9 |
| S25030    | -3.6  | 15.4 | -11.2 | -6.2  | 6.6  | -10.6 | -6.3  | 7.2  | -16.7 |
| S25034    | -2.0  | 8.4  | -12.6 | -6.9  | 3.0  | -13.2 | -7.7  | 3.8  | -18.8 |
| S26021    | -2.2  | 7.6  | -13.2 | -7.2  | 2.4  | -13.5 | -7.9  | 2.4  | -19.2 |
| S26058    | -3.6  | 6.0  | -13.1 | -7.5  | 2.4  | -17.6 | -8.0  | 2.6  | -23.2 |
| S27002    | -3.9  | 20.8 | -15.4 | -6.6  | 9.1  | -13.7 | -6.5  | 11.2 | -20.5 |
| S30007    | -2.9  | 9.6  | -13.6 | -7.8  | 2.1  | -10.4 | -5.7  | 1.5  | -16.3 |
| S32012    | -0.8  | 12.3 | -11.7 | -5.7  | 5.4  | -13.7 | -3.3  | 11.3 | -18.9 |
| S33001    | -0.1  | 13.6 | -12.0 | -6.6  | 9.0  | -14.0 | -6.1  | 12.4 | -20.0 |
| S34001    | -2.5  | 11.3 | -12.8 | -7.2  | 3.6  | -11.4 | -5.6  | 7.5  | -17.1 |
| S35002    | -1.8  | 10.8 | -10.4 | -6.2  | 5.2  | -10.1 | -5.8  | 10.1 | -15.8 |
| S35005    | -2.6  | 6.8  | -12.0 | -7.5  | 3.0  | -11.9 | -5.3  | 2.8  | -18.2 |
| S36015    | -2.2  | 4.2  | -12.6 | -8.0  | 0.5  | -12.1 | -6.7  | 1.5  | -18.1 |
| S36019    | -4.6  | 9.2  | -17.2 | -10.8 | 3.9  | -16.5 | -9.0  | 3.9  | -26.6 |
| S38001    | -1.0  | 4.2  | -9.3  | -5.6  | 3.7  | -10.1 | -4.4  | 2.8  | -13.8 |
| S39009    | -1.2  | 11.3 | -9.4  | -5.1  | 7.7  | -12.9 | -4.2  | 11.2 | -16.6 |

| SSP585    |       |      |       |       |      |       |       |      |       |
|-----------|-------|------|-------|-------|------|-------|-------|------|-------|
| MAM       |       |      |       |       |      |       |       |      |       |
| Catchment | 2020s |      |       | 2050s |      |       | 2080s |      |       |
|           | med   | upp  | low   | med   | upp  | low   | med   | upp  | low   |
| S06013    | -0.4  | 15.4 | -10.9 | -8.6  | 8.3  | -12.1 | -12.6 | 8.1  | -19.7 |
| S06014    | -0.3  | 15.4 | -10.6 | -8.3  | 8.4  | -11.8 | -12.1 | 8.3  | -19.1 |
| S07009    | -1.2  | 7.4  | -11.3 | -9.4  | 1.4  | -11.6 | -13.1 | 2.1  | -20.6 |
| S07012    | -1.3  | 7.3  | -11.2 | -9.6  | 1.1  | -11.6 | -13.2 | 1.5  | -20.7 |
| S12001    | 1.3   | 11.8 | -12.0 | -6.6  | 6.3  | -9.9  | -10.8 | 13.7 | -19.5 |
| S14007    | -0.7  | 5.7  | -13.3 | -9.2  | 3.1  | -17.6 | -12.4 | -0.1 | -19.6 |
| S15003    | 0.4   | 10.9 | -11.1 | -7.4  | 4.1  | -12.4 | -12.1 | 4.7  | -19.1 |
| S15006    | -0.3  | 15.9 | -11.7 | -7.4  | 6.8  | -13.6 | -13.0 | 10.1 | -20.4 |
| S15007    | 0.2   | 22.4 | -13.0 | -7.3  | 12.9 | -18.0 | -6.9  | 11.2 | -23.2 |
| S16008    | -3.7  | 9.8  | -12.2 | -10.9 | 2.2  | -16.4 | -15.2 | 3.1  | -22.6 |
| S16011    | -2.5  | 9.3  | -10.2 | -8.5  | 2.7  | -13.3 | -12.1 | 4.5  | -18.3 |
| S18002    | -3.0  | 13.7 | -7.7  | -5.5  | 3.6  | -11.8 | -10.6 | 5.9  | -15.0 |
| S18003    | -2.7  | 13.5 | -7.6  | -5.2  | 3.5  | -11.7 | -10.4 | 5.6  | -14.6 |
| S18006    | -2.6  | 13.3 | -7.6  | -5.2  | 3.3  | -11.6 | -10.3 | 5.3  | -14.6 |
| S18050    | -2.8  | 12.6 | -8.8  | -5.3  | 3.6  | -10.9 | -9.4  | 5.3  | -17.2 |
| S22006    | -2.5  | 14.0 | -8.7  | -4.6  | 4.4  | -10.5 | -9.2  | 6.7  | -18.0 |
| S22035    | -0.7  | 14.8 | -9.3  | -5.2  | 4.7  | -10.1 | -7.0  | 7.5  | -19.7 |
| S23002    | -3.5  | 12.0 | -9.1  | -6.3  | 1.2  | -11.7 | -10.7 | 3.6  | -18.5 |
| S24008    | -3.7  | 12.1 | -9.2  | -8.2  | 0.3  | -13.6 | -13.4 | 3.3  | -18.7 |
| S24030    | -4.2  | 12.0 | -8.7  | -7.6  | 0.5  | -13.1 | -11.8 | 3.7  | -17.7 |
| S25002    | -2.6  | 19.4 | -11.7 | -7.8  | 8.4  | -14.6 | -14.2 | 8.0  | -21.1 |
| S25006    | -2.5  | 9.6  | -14.6 | -9.0  | 1.3  | -17.7 | -14.1 | 0.8  | -21.2 |
| S25030    | -2.9  | 19.7 | -9.6  | -7.5  | 8.2  | -12.3 | -10.0 | 11.0 | -17.8 |
| S25034    | -0.8  | 8.7  | -13.8 | -7.2  | 1.6  | -15.2 | -11.8 | 0.2  | -20.1 |
| S26021    | -1.2  | 8.1  | -14.2 | -7.4  | 1.0  | -15.5 | -12.8 | -1.0 | -20.3 |
| S26058    | -1.8  | 4.6  | -14.2 | -10.3 | 1.1  | -18.4 | -13.3 | -6.2 | -20.2 |
| S27002    | -3.7  | 26.5 | -13.1 | -8.1  | 11.7 | -15.0 | -10.4 | 16.8 | -21.9 |
| S30007    | -3.2  | 13.3 | -12.3 | -7.2  | 3.0  | -15.0 | -8.9  | 5.7  | -19.3 |
| S32012    | 0.7   | 21.3 | -11.4 | -5.5  | 10.2 | -17.7 | -5.5  | 11.8 | -22.1 |
| S33001    | 0.2   | 22.4 | -13.0 | -7.3  | 12.9 | -18.0 | -6.9  | 11.2 | -23.2 |
| S34001    | -1.3  | 19.7 | -11.6 | -6.5  | 8.0  | -16.1 | -8.8  | 8.2  | -19.6 |
| S35002    | -0.4  | 20.8 | -10.5 | -5.8  | 7.9  | -14.9 | -7.6  | 11.0 | -20.5 |
| S35005    | -0.9  | 9.5  | -12.6 | -6.7  | 2.4  | -15.8 | -10.0 | -0.1 | -17.0 |
| S36015    | -1.3  | 9.4  | -13.1 | -9.2  | -1.0 | -16.1 | -12.4 | -1.1 | -19.9 |
| S36019    | -3.3  | 13.0 | -17.3 | -10.6 | 2.4  | -20.3 | -15.6 | -3.2 | -23.6 |
| S38001    | -0.8  | 11.7 | -10.1 | -6.2  | -0.1 | -14.1 | -9.1  | 2.4  | -16.8 |
| S39009    | -0.9  | 18.5 | -11.1 | -6.8  | 13.8 | -17.7 | -7.6  | 8.9  | -20.2 |

| SSP126    |       |      |       |       |      |       |       |      |       |
|-----------|-------|------|-------|-------|------|-------|-------|------|-------|
| JJA       |       |      |       |       |      |       |       |      |       |
| Catchment | 2020s |      |       | 2050s |      |       | 2080s |      |       |
|           | med   | upp  | low   | med   | upp  | low   | med   | upp  | low   |
| S06013    | 3.3   | 30.0 | -17.7 | 5.5   | 40.1 | -11.0 | 3.9   | 42.8 | -9.8  |
| S06014    | 3.0   | 29.2 | -17.9 | 4.4   | 39.3 | -11.4 | 3.5   | 41.5 | -10.2 |
| S07009    | -0.6  | 17.3 | -16.4 | 1.5   | 21.0 | -16.7 | -1.3  | 19.9 | -10.7 |
| S07012    | -0.6  | 16.4 | -16.7 | 1.2   | 20.4 | -17.0 | -1.5  | 19.1 | -11.1 |
| S12001    | -4.3  | 34.1 | -21.7 | -5.3  | 40.7 | -24.7 | -6.9  | 39.2 | -20.0 |
| S14007    | -0.4  | 12.6 | -15.9 | 0.9   | 21.2 | -16.5 | -0.7  | 15.7 | -10.4 |
| S15003    | -2.8  | 29.8 | -17.3 | -4.8  | 39.8 | -23.9 | -2.3  | 32.0 | -12.6 |
| S15006    | -1.3  | 38.2 | -17.2 | -4.9  | 42.9 | -23.6 | -2.6  | 49.0 | -14.1 |
| S15007    | -5.0  | 14.1 | -8.3  | 0.9   | 18.4 | -16.5 | 7.7   | 21.7 | -12.4 |
| S16008    | -2.1  | 37.5 | -22.0 | -5.3  | 21.2 | -26.4 | -5.0  | 14.2 | -17.0 |
| S16011    | -2.0  | 28.7 | -19.4 | -7.2  | 16.2 | -24.3 | -6.1  | 9.9  | -14.6 |
| S18002    | 0.5   | 31.4 | -11.8 | -1.0  | 23.3 | -23.7 | -0.8  | 23.3 | -17.3 |
| S18003    | -0.3  | 30.2 | -11.5 | -3.3  | 22.8 | -23.6 | -1.6  | 22.4 | -16.8 |
| S18006    | -0.7  | 29.6 | -11.5 | -3.5  | 22.5 | -23.6 | -2.0  | 22.1 | -16.7 |
| S18050    | -6.4  | 26.0 | -11.7 | -4.7  | 21.0 | -25.0 | -5.4  | 20.2 | -17.2 |
| S22006    | -5.9  | 22.9 | -12.6 | -4.7  | 16.7 | -25.9 | -5.8  | 14.2 | -17.8 |
| S22035    | -4.9  | 22.2 | -12.4 | -6.1  | 16.4 | -23.5 | -6.1  | 14.2 | -15.3 |
| S23002    | -6.6  | 26.9 | -14.9 | -3.2  | 27.2 | -25.0 | -2.0  | 20.6 | -17.5 |
| S24008    | 1.9   | 32.7 | -15.5 | 2.9   | 29.4 | -23.0 | 1.9   | 22.2 | -19.1 |
| S24030    | 1.5   | 32.4 | -14.9 | 3.5   | 29.3 | -22.3 | 2.4   | 22.8 | -18.5 |
| S25002    | 4.4   | 59.9 | -22.9 | -8.2  | 59.7 | -28.2 | 2.3   | 61.6 | -17.5 |
| S25006    | 4.2   | 20.9 | -17.0 | 0.7   | 16.8 | -17.1 | 0.5   | 19.4 | -16.1 |
| S25030    | 2.2   | 49.1 | -15.6 | 0.3   | 52.4 | -20.4 | 6.0   | 51.3 | -13.2 |
| S25034    | 2.9   | 13.7 | -13.0 | 3.3   | 19.5 | -17.1 | 0.7   | 24.0 | -11.1 |
| S26021    | 2.3   | 11.9 | -13.7 | 2.4   | 17.4 | -17.8 | -0.8  | 21.4 | -12.1 |
| S26058    | -0.5  | 8.1  | -17.6 | 0.9   | 14.3 | -18.0 | -2.2  | 13.2 | -14.1 |
| S27002    | 1.1   | 87.1 | -23.0 | 2.2   | 89.1 | -30.4 | 10.6  | 88.1 | -19.8 |
| S30007    | 0.8   | 20.7 | -11.2 | 2.6   | 19.5 | -11.4 | 8.4   | 18.9 | -8.9  |
| S32012    | -5.5  | 15.2 | -15.3 | 0.1   | 23.8 | -16.7 | 8.1   | 21.8 | -12.5 |
| S33001    | -5.0  | 14.1 | -8.3  | 0.9   | 18.4 | -16.5 | 7.7   | 21.7 | -12.4 |
| S34001    | -3.8  | 17.4 | -14.4 | 1.9   | 25.3 | -10.4 | 7.3   | 25.2 | -10.5 |
| S35002    | -3.2  | 14.6 | -10.4 | 2.4   | 19.4 | -11.6 | 7.4   | 23.8 | -12.7 |
| S35005    | 3.0   | 14.2 | -18.5 | 3.4   | 23.9 | -13.1 | 3.6   | 23.0 | -14.2 |
| S36015    | 4.2   | 18.8 | -12.7 | 5.0   | 23.4 | -11.5 | 7.2   | 25.7 | -11.7 |
| S36019    | 3.4   | 28.1 | -27.7 | 5.4   | 36.2 | -17.6 | 1.1   | 35.9 | -17.3 |
| S38001    | -4.1  | 9.6  | -13.4 | -0.6  | 10.0 | -11.6 | 7.5   | 11.7 | -14.8 |
| S39009    | -1.3  | 14.9 | -9.3  | -0.5  | 17.7 | -16.5 | 6.8   | 28.7 | -15.0 |

| SSP370    |       |      |       |       |      |       |       |       |       |
|-----------|-------|------|-------|-------|------|-------|-------|-------|-------|
| JJA       |       |      |       |       |      |       |       |       |       |
| Catchment | 2020s |      |       | 2050s |      |       | 2080s |       |       |
|           | med   | upp  | low   | med   | upp  | low   | med   | upp   | low   |
| S06013    | -1.4  | 19.7 | -10.7 | -5.3  | 34.7 | -14.7 | -14.2 | 16.6  | -21.5 |
| S06014    | -2.4  | 18.1 | -11.3 | -6.0  | 34.1 | -14.9 | -15.3 | 13.9  | -22.2 |
| S07009    | -9.6  | 6.8  | -15.1 | -6.0  | 13.1 | -20.1 | -17.2 | 1.9   | -27.5 |
| S07012    | -9.8  | 6.0  | -15.6 | -6.7  | 12.4 | -20.3 | -17.6 | 0.6   | -28.0 |
| S12001    | -12.8 | 14.4 | -19.9 | -12.1 | 28.4 | -23.9 | -29.7 | 5.1   | -35.7 |
| S14007    | -7.2  | 9.0  | -13.7 | -4.1  | 13.9 | -19.4 | -17.6 | 6.8   | -24.6 |
| S15003    | -7.1  | 13.9 | -15.2 | -10.7 | 31.1 | -19.8 | -22.3 | 11.6  | -30.4 |
| S15006    | -5.7  | 22.5 | -12.0 | -10.3 | 40.7 | -20.4 | -20.4 | 15.6  | -30.4 |
| S15007    | -3.1  | 10.8 | -9.7  | -7.2  | 12.9 | -20.6 | -20.0 | 1.7   | -29.1 |
| S16008    | -2.9  | 11.0 | -16.6 | -12.3 | 17.1 | -27.2 | -28.6 | -8.2  | -39.1 |
| S16011    | -3.0  | 8.3  | -14.8 | -11.7 | 13.6 | -25.2 | -27.3 | -9.8  | -36.4 |
| S18002    | -3.1  | 18.6 | -14.6 | -10.5 | 25.7 | -23.5 | -21.4 | 1.8   | -35.6 |
| S18003    | -5.9  | 16.6 | -14.8 | -10.8 | 24.9 | -26.1 | -24.2 | 1.1   | -35.8 |
| S18006    | -6.0  | 15.7 | -15.1 | -11.0 | 24.3 | -26.1 | -24.6 | 0.6   | -36.1 |
| S18050    | -6.2  | 11.5 | -17.1 | -12.8 | 21.6 | -27.0 | -27.3 | -2.4  | -38.1 |
| S22006    | -6.4  | 10.3 | -18.4 | -14.1 | 18.2 | -27.8 | -28.6 | -10.8 | -41.7 |
| S22035    | -4.4  | 9.7  | -21.3 | -14.2 | 17.9 | -27.8 | -28.6 | -10.9 | -39.8 |
| S23002    | -3.2  | 14.5 | -17.2 | -13.4 | 25.6 | -27.4 | -27.5 | 0.4   | -38.4 |
| S24008    | 1.2   | 20.2 | -13.4 | -9.0  | 29.4 | -21.7 | -21.2 | 4.8   | -33.4 |
| S24030    | 1.6   | 20.6 | -12.7 | -8.4  | 29.7 | -22.8 | -18.8 | 5.9   | -32.4 |
| S25002    | -3.6  | 30.3 | -19.9 | -13.7 | 55.7 | -30.1 | -34.5 | 18.6  | -47.1 |
| S25006    | -3.6  | 5.6  | -13.5 | -10.5 | 6.4  | -22.8 | -23.7 | -10.1 | -33.7 |
| S25030    | 0.7   | 31.6 | -11.9 | -9.0  | 51.7 | -22.1 | -24.5 | 23.1  | -31.7 |
| S25034    | -4.3  | 7.2  | -12.3 | -3.9  | 13.4 | -19.0 | -18.8 | 2.5   | -26.2 |
| S26021    | -4.6  | 4.7  | -13.5 | -5.9  | 10.3 | -19.9 | -20.0 | -1.6  | -27.7 |
| S26058    | -9.1  | 4.4  | -17.3 | -8.5  | 7.1  | -20.0 | -19.5 | -2.3  | -28.0 |
| S27002    | 2.1   | 53.7 | -13.7 | -12.9 | 88.0 | -33.4 | -34.8 | 41.4  | -46.2 |
| S30007    | 1.2   | 8.4  | -11.1 | -8.2  | 18.6 | -22.8 | -21.8 | 0.6   | -26.9 |
| S32012    | -2.4  | 7.3  | -11.6 | -7.3  | 19.6 | -22.3 | -23.2 | 1.2   | -28.7 |
| S33001    | -3.1  | 10.8 | -9.7  | -7.2  | 12.9 | -20.6 | -20.0 | 1.7   | -29.1 |
| S34001    | 0.0   | 7.6  | -10.6 | -4.7  | 20.8 | -22.0 | -20.0 | 3.6   | -27.2 |
| S35002    | -2.7  | 9.5  | -12.1 | -6.2  | 13.7 | -25.2 | -19.3 | 3.0   | -29.4 |
| S35005    | -4.3  | 3.9  | -14.6 | -9.6  | 18.5 | -19.8 | -19.7 | -1.0  | -26.6 |
| S36015    | -3.9  | 10.8 | -12.7 | -6.4  | 18.9 | -16.2 | -16.7 | 3.2   | -25.1 |
| S36019    | -4.1  | 10.9 | -17.9 | -12.5 | 27.8 | -21.5 | -26.0 | -0.2  | -33.0 |
| S38001    | -6.2  | 5.9  | -14.2 | -7.8  | 9.4  | -20.9 | -15.9 | -4.4  | -28.0 |
| S39009    | -3.6  | 11.7 | -9.8  | -7.0  | 21.1 | -20.2 | -15.5 | 0.9   | -27.4 |

| SSP585    |       |      |       |       |      |       |       |       |       |
|-----------|-------|------|-------|-------|------|-------|-------|-------|-------|
| JJA       |       |      |       |       |      |       |       |       |       |
| Catchment | 2020s |      |       | 2050s |      |       | 2080s |       |       |
|           | med   | upp  | low   | med   | upp  | low   | med   | upp   | low   |
| S06013    | -3.1  | 32.0 | -13.5 | -7.6  | 22.0 | -19.2 | -15.9 | 13.9  | -25.3 |
| S06014    | -3.3  | 30.8 | -14.0 | -8.2  | 21.3 | -19.8 | -17.7 | 11.3  | -26.2 |
| S07009    | -4.1  | 16.9 | -22.1 | -13.5 | 0.3  | -21.8 | -20.2 | -1.9  | -30.4 |
| S07012    | -4.5  | 16.0 | -22.4 | -13.9 | -0.8 | -22.3 | -21.3 | -3.4  | -31.3 |
| S12001    | -6.1  | 25.2 | -28.7 | -21.2 | 12.3 | -33.3 | -33.8 | 2.9   | -42.6 |
| S14007    | -3.0  | 13.0 | -20.9 | -12.8 | -1.7 | -21.0 | -18.3 | -3.2  | -28.3 |
| S15003    | -5.2  | 20.2 | -23.3 | -16.4 | 12.8 | -27.3 | -26.5 | 5.2   | -35.4 |
| S15006    | -5.5  | 33.8 | -20.4 | -15.4 | 21.9 | -27.1 | -25.9 | 10.0  | -34.2 |
| S15007    | -0.9  | 18.2 | -19.2 | -13.1 | 5.1  | -27.9 | -23.7 | -7.8  | -37.7 |
| S16008    | -4.9  | 12.9 | -27.5 | -19.6 | 0.8  | -33.7 | -31.9 | -18.2 | -44.6 |
| S16011    | -4.6  | 8.8  | -24.9 | -18.2 | -0.9 | -33.2 | -29.9 | -17.5 | -42.4 |
| S18002    | -6.1  | 18.5 | -23.3 | -19.7 | 9.9  | -28.7 | -28.9 | -2.6  | -40.6 |
| S18003    | -8.5  | 17.4 | -23.6 | -20.2 | 7.1  | -29.0 | -29.3 | -6.2  | -41.0 |
| S18006    | -8.5  | 16.8 | -23.8 | -20.5 | 6.6  | -29.2 | -29.7 | -6.9  | -41.3 |
| S18050    | -10.0 | 13.2 | -25.1 | -22.7 | 4.0  | -32.3 | -32.5 | -11.2 | -44.6 |
| S22006    | -9.8  | 11.1 | -25.5 | -22.7 | -1.2 | -34.0 | -35.3 | -18.6 | -49.1 |
| S22035    | -9.6  | 10.7 | -25.6 | -20.5 | -1.2 | -35.7 | -34.7 | -18.5 | -50.3 |
| S23002    | -10.3 | 13.3 | -25.1 | -22.8 | 4.7  | -32.6 | -31.8 | -11.7 | -45.0 |
| S24008    | -5.2  | 19.9 | -21.0 | -18.3 | 8.1  | -27.4 | -24.1 | -4.4  | -37.8 |
| S24030    | -4.9  | 20.4 | -20.4 | -17.6 | 8.6  | -26.6 | -23.0 | -2.9  | -36.8 |
| S25002    | -6.1  | 39.6 | -32.8 | -20.4 | 30.6 | -44.6 | -35.9 | 7.2   | -52.2 |
| S25006    | -2.7  | 14.9 | -19.0 | -17.0 | -5.4 | -30.0 | -28.1 | -15.4 | -38.0 |
| S25030    | -3.1  | 46.3 | -22.4 | -14.6 | 31.1 | -30.5 | -21.8 | 13.3  | -35.6 |
| S25034    | -2.0  | 14.8 | -21.5 | -13.8 | -0.8 | -22.5 | -18.6 | -7.2  | -31.2 |
| S26021    | -2.3  | 12.9 | -21.6 | -14.5 | -2.8 | -24.1 | -21.2 | -10.5 | -33.0 |
| S26058    | -3.4  | 9.3  | -24.1 | -15.4 | -8.1 | -24.3 | -23.9 | -13.2 | -33.5 |
| S27002    | -4.2  | 82.2 | -31.8 | -19.0 | 54.1 | -42.0 | -31.6 | 25.8  | -48.6 |
| S30007    | -1.2  | 20.4 | -16.1 | -15.6 | 3.5  | -24.4 | -21.0 | -6.7  | -30.6 |
| S32012    | -1.1  | 15.2 | -20.9 | -17.5 | 5.9  | -27.6 | -24.2 | -9.7  | -37.8 |
| S33001    | -0.9  | 18.2 | -19.2 | -13.1 | 5.1  | -27.9 | -23.7 | -7.8  | -37.7 |
| S34001    | -0.7  | 19.2 | -18.3 | -12.1 | 8.7  | -25.4 | -20.4 | -6.1  | -30.1 |
| S35002    | -2.6  | 16.1 | -19.4 | -15.7 | 6.7  | -27.9 | -23.0 | -5.0  | -34.2 |
| S35005    | -2.7  | 13.8 | -18.1 | -14.6 | 7.5  | -25.0 | -22.8 | -4.8  | -33.9 |
| S36015    | -2.3  | 18.7 | -17.2 | -10.9 | 8.7  | -23.5 | -19.7 | -3.2  | -29.8 |
| S36019    | -2.9  | 30.3 | -22.0 | -14.7 | 13.5 | -34.5 | -29.9 | -1.7  | -41.3 |
| S38001    | -3.4  | 6.9  | -20.5 | -13.1 | 0.7  | -28.5 | -22.5 | -12.0 | -35.3 |
| S39009    | -1.0  | 15.4 | -13.5 | -14.5 | 7.8  | -29.1 | -21.6 | -5.1  | -36.5 |

| SSP126<br>SON |       |      |       |       |      |      |       |      |      |
|---------------|-------|------|-------|-------|------|------|-------|------|------|
| Catchment     | 2020s |      |       | 2050s |      |      | 2080s |      |      |
|               | med   | upp  | low   | med   | upp  | low  | med   | upp  | low  |
| S06013        | 13.2  | 29.0 | -4.2  | 14.4  | 39.6 | 8.1  | 27.4  | 52.6 | 10.5 |
| S06014        | 11.9  | 27.5 | -4.1  | 13.3  | 36.8 | 7.4  | 25.8  | 48.8 | 9.0  |
| S07009        | 9.5   | 24.2 | -5.2  | 11.6  | 32.2 | -1.3 | 23.6  | 39.5 | 4.5  |
| S07012        | 8.8   | 23.5 | -5.2  | 11.2  | 31.2 | -1.4 | 23.0  | 38.3 | 4.2  |
| S12001        | 15.4  | 32.9 | -9.9  | 15.2  | 28.5 | -4.4 | 29.8  | 48.0 | 4.8  |
| S14007        | 7.9   | 23.9 | -6.2  | 11.7  | 35.0 | -7.9 | 24.6  | 35.4 | 4.1  |
| S15003        | 10.6  | 22.7 | -6.4  | 10.7  | 21.8 | -1.4 | 21.4  | 26.4 | 3.9  |
| S15006        | 10.7  | 29.0 | -4.1  | 11.7  | 28.4 | -1.7 | 23.1  | 35.2 | 4.3  |
| S15007        | 7.7   | 25.2 | -8.0  | 8.1   | 32.8 | -1.6 | 15.3  | 36.5 | -0.9 |
| S16008        | 16.5  | 26.8 | -13.8 | 12.5  | 26.7 | 3.6  | 25.8  | 37.0 | 4.3  |
| S16011        | 16.3  | 25.6 | -15.1 | 11.1  | 23.6 | 2.5  | 24.0  | 35.7 | 3.3  |
| S18002        | 7.5   | 22.8 | -10.6 | 8.1   | 24.6 | -1.3 | 18.2  | 33.7 | -0.7 |
| S18003        | 7.1   | 21.5 | -10.1 | 6.2   | 23.1 | -1.6 | 15.6  | 31.5 | -1.3 |
| S18006        | 6.9   | 20.9 | -9.9  | 6.0   | 22.4 | -1.6 | 15.1  | 30.5 | -1.4 |
| S18050        | 5.6   | 18.0 | -9.0  | 5.0   | 17.3 | -1.9 | 12.7  | 25.7 | -2.4 |
| S22006        | 4.7   | 17.1 | -8.9  | 3.6   | 16.0 | -2.9 | 10.5  | 23.5 | -3.4 |
| S22035        | 5.7   | 16.7 | -9.7  | 3.4   | 15.7 | -5.5 | 10.1  | 22.8 | -3.8 |
| S23002        | 5.7   | 17.1 | -9.2  | 6.0   | 17.1 | -2.1 | 14.7  | 25.3 | -2.1 |
| S24008        | 9.4   | 28.7 | -11.7 | 12.1  | 30.6 | -0.4 | 23.5  | 42.8 | 2.1  |
| S24030        | 8.7   | 26.4 | -10.9 | 11.4  | 28.9 | -0.5 | 23.4  | 40.2 | 1.2  |
| S25002        | 10.7  | 25.9 | -4.1  | 9.0   | 24.6 | 6.5  | 19.5  | 33.0 | 6.8  |
| S25006        | 15.6  | 29.8 | -5.4  | 17.1  | 41.2 | 6.3  | 32.3  | 47.5 | 14.0 |
| S25030        | 7.7   | 26.7 | -8.9  | 8.4   | 29.6 | 2.3  | 18.5  | 38.0 | -0.1 |
| S25034        | 7.5   | 23.0 | -3.8  | 10.8  | 30.5 | -1.5 | 20.7  | 32.5 | 2.9  |
| S26021        | 6.9   | 21.6 | -3.5  | 11.0  | 29.6 | -1.6 | 21.3  | 32.1 | 3.0  |
| S26058        | 4.8   | 21.6 | -6.5  | 9.8   | 28.9 | -8.6 | 20.2  | 31.2 | 1.5  |
| S27002        | 9.5   | 31.8 | -11.1 | 9.6   | 35.6 | 3.2  | 22.5  | 45.4 | -1.1 |
| S30007        | 8.1   | 18.2 | -9.0  | 9.5   | 28.8 | 2.7  | 20.0  | 31.1 | 0.6  |
| S32012        | 7.6   | 21.2 | -8.5  | 7.5   | 28.7 | -2.6 | 14.2  | 32.3 | -1.6 |
| S33001        | 7.7   | 25.2 | -8.0  | 8.1   | 32.8 | -1.6 | 15.3  | 36.5 | -0.9 |
| S34001        | 8.5   | 25.3 | -9.4  | 9.7   | 33.8 | 3.7  | 17.6  | 38.7 | -0.4 |
| S35002        | 7.2   | 22.4 | -8.6  | 7.6   | 29.2 | 2.4  | 14.9  | 33.1 | -2.1 |
| S35005        | 4.9   | 18.0 | -5.6  | 7.2   | 21.3 | 3.3  | 16.0  | 22.4 | 1.6  |
| S36015        | 6.9   | 18.8 | -5.5  | 9.7   | 26.5 | 5.2  | 18.8  | 28.4 | 4.2  |
| S36019        | 10.2  | 30.3 | -6.5  | 13.8  | 38.0 | 8.8  | 29.3  | 41.3 | 7.7  |
| S38001        | 5.7   | 10.4 | -6.1  | 4.8   | 20.4 | -0.1 | 8.2   | 15.3 | -2.1 |
| S39009        | 6.2   | 26.3 | -7.2  | 5.9   | 31.3 | -3.2 | 8.5   | 37.8 | -1.9 |



| SSP370<br>SON |       |      |       |       |      |      |       |      |       |
|---------------|-------|------|-------|-------|------|------|-------|------|-------|
| Catchment     | 2020s |      |       | 2050s |      |      | 2080s |      |       |
|               | med   | upp  | low   | med   | upp  | low  | med   | upp  | low   |
| S06013        | 4.8   | 33.5 | -2.9  | 20.3  | 44.3 | 4.8  | 19.1  | 41.4 | 1.3   |
| S06014        | 4.2   | 30.9 | -3.3  | 18.4  | 40.9 | 3.7  | 17.3  | 37.5 | 0.4   |
| S07009        | 4.5   | 22.4 | -6.0  | 15.8  | 29.4 | -1.1 | 12.5  | 29.3 | -7.0  |
| S07012        | 4.4   | 21.8 | -6.1  | 15.1  | 28.5 | -1.3 | 12.0  | 28.1 | -7.1  |
| S12001        | 5.8   | 33.9 | -12.2 | 14.1  | 35.9 | -3.8 | 12.3  | 28.4 | -12.7 |
| S14007        | 1.5   | 23.1 | -5.9  | 14.7  | 32.7 | -2.9 | 13.3  | 31.2 | -6.9  |
| S15003        | 5.2   | 22.7 | -9.1  | 9.3   | 23.6 | -1.3 | 8.3   | 20.1 | -6.7  |
| S15006        | 5.3   | 30.6 | -9.9  | 9.7   | 34.0 | -1.5 | 9.7   | 27.5 | -7.2  |
| S15007        | 5.1   | 25.3 | -3.3  | 5.5   | 35.9 | 0.2  | 9.6   | 36.6 | -6.7  |
| S16008        | 12.2  | 24.7 | -11.7 | 11.7  | 26.4 | -0.1 | 6.4   | 23.6 | -7.1  |
| S16011        | 10.9  | 23.7 | -13.3 | 9.5   | 25.2 | -2.4 | 2.4   | 21.3 | -12.4 |
| S18002        | 6.2   | 23.3 | -8.1  | 7.4   | 24.4 | -2.5 | 7.0   | 20.3 | -6.4  |
| S18003        | 6.0   | 21.8 | -7.7  | 6.7   | 22.8 | -2.6 | 6.4   | 18.7 | -6.2  |
| S18006        | 5.8   | 21.2 | -7.6  | 6.3   | 22.0 | -2.7 | 6.0   | 17.9 | -6.2  |
| S18050        | 5.3   | 16.6 | -6.8  | 4.2   | 18.7 | -2.9 | 4.1   | 14.5 | -6.0  |
| S22006        | 5.1   | 15.5 | -6.9  | 3.3   | 16.7 | -3.1 | 3.1   | 12.4 | -8.1  |
| S22035        | 4.5   | 15.1 | -7.6  | 3.3   | 16.3 | -4.8 | 3.3   | 12.3 | -9.8  |
| S23002        | 5.1   | 17.7 | -7.3  | 3.6   | 18.8 | -3.3 | 4.3   | 17.6 | -7.7  |
| S24008        | 7.2   | 29.3 | -9.9  | 9.7   | 32.1 | -2.1 | 8.5   | 30.5 | -7.2  |
| S24030        | 7.1   | 27.4 | -9.1  | 9.2   | 29.5 | -1.9 | 8.4   | 28.6 | -6.7  |
| S25002        | 10.0  | 25.4 | -8.9  | 9.7   | 28.9 | 0.0  | 8.0   | 22.5 | -6.3  |
| S25006        | 7.4   | 28.3 | -6.3  | 19.3  | 39.5 | 4.2  | 11.4  | 35.2 | 1.7   |
| S25030        | 8.6   | 28.2 | -6.7  | 8.8   | 31.8 | -0.5 | 6.4   | 31.4 | -3.7  |
| S25034        | 4.4   | 21.3 | -6.0  | 13.2  | 30.6 | -1.6 | 11.8  | 28.8 | -7.2  |
| S26021        | 4.3   | 20.7 | -6.5  | 12.5  | 29.4 | -1.7 | 11.0  | 27.2 | -7.6  |
| S26058        | 0.7   | 19.6 | -6.5  | 11.8  | 28.9 | -4.6 | 9.2   | 26.6 | -8.7  |
| S27002        | 9.7   | 33.9 | -7.7  | 11.6  | 37.1 | 0.4  | 9.8   | 37.7 | -2.1  |
| S30007        | 8.7   | 19.4 | -3.9  | 9.2   | 27.3 | 3.1  | 8.9   | 26.7 | 1.7   |
| S32012        | 7.7   | 22.9 | -3.5  | 9.7   | 31.1 | -0.9 | 7.9   | 31.4 | -1.1  |
| S33001        | 5.1   | 25.3 | -3.3  | 5.5   | 35.9 | 0.2  | 9.6   | 36.6 | -6.7  |
| S34001        | 6.7   | 26.3 | -2.5  | 12.0  | 36.1 | 3.5  | 9.0   | 35.6 | 2.6   |
| S35002        | 2.8   | 23.1 | -2.6  | 6.2   | 31.4 | 1.4  | 9.3   | 31.4 | 1.5   |
| S35005        | 2.4   | 17.5 | -4.6  | 8.7   | 21.9 | -1.3 | 7.9   | 18.4 | -2.8  |
| S36015        | 2.9   | 21.6 | -4.4  | 10.3  | 28.1 | 1.0  | 11.3  | 28.6 | -1.9  |
| S36019        | 4.9   | 31.6 | -4.9  | 19.8  | 41.5 | 3.4  | 17.5  | 36.5 | -0.6  |
| S38001        | 3.8   | 11.1 | -0.8  | 7.5   | 16.1 | -0.5 | 7.8   | 16.3 | -0.1  |
| S39009        | 1.6   | 23.8 | -2.1  | 6.6   | 34.7 | -2.3 | 10.6  | 33.2 | -1.9  |

| SSP585<br>SON |       |      |       |       |      |       |       |      |       |
|---------------|-------|------|-------|-------|------|-------|-------|------|-------|
| Catchment     | 2020s |      |       | 2050s |      |       | 2080s |      |       |
|               | med   | upp  | low   | med   | upp  | low   | med   | upp  | low   |
| S06013        | 11.0  | 29.4 | -4.6  | 12.5  | 44.7 | -2.7  | 13.3  | 45.5 | 1.7   |
| S06014        | 9.8   | 27.6 | -5.3  | 11.1  | 40.9 | -3.2  | 11.7  | 40.9 | 0.1   |
| S07009        | 3.9   | 22.5 | -12.5 | 8.3   | 23.8 | -12.0 | 7.5   | 29.5 | -12.8 |
| S07012        | 3.4   | 21.8 | -12.7 | 7.5   | 22.8 | -12.0 | 6.5   | 27.9 | -13.1 |
| S12001        | 5.7   | 28.0 | -18.9 | 10.2  | 39.1 | -17.7 | 4.1   | 23.8 | -23.1 |
| S14007        | 2.7   | 21.8 | -12.2 | 8.0   | 25.3 | -11.9 | 5.9   | 30.0 | -12.2 |
| S15003        | 3.9   | 18.7 | -11.3 | 6.3   | 24.8 | -11.1 | 6.5   | 16.4 | -13.2 |
| S15006        | 3.7   | 26.8 | -12.0 | 5.9   | 31.4 | -11.8 | 5.5   | 23.9 | -14.4 |
| S15007        | 5.6   | 27.0 | -3.3  | 5.8   | 34.4 | -5.3  | 6.2   | 35.1 | -2.3  |
| S16008        | 11.1  | 22.7 | -13.7 | 5.9   | 24.6 | -4.2  | 2.3   | 22.3 | -11.4 |
| S16011        | 10.0  | 21.7 | -15.9 | 3.2   | 21.4 | -7.3  | -3.6  | 17.3 | -16.6 |
| S18002        | 6.6   | 23.1 | -12.2 | 4.9   | 25.4 | -10.0 | 1.4   | 16.9 | -10.1 |
| S18003        | 6.1   | 22.0 | -11.9 | 4.9   | 24.0 | -9.7  | 1.3   | 15.2 | -9.7  |
| S18006        | 5.7   | 21.4 | -11.9 | 4.7   | 23.2 | -9.7  | 1.0   | 14.6 | -9.9  |
| S18050        | 4.5   | 17.3 | -11.3 | 4.2   | 19.7 | -9.2  | -0.1  | 12.1 | -10.1 |
| S22006        | 4.2   | 16.3 | -10.4 | 4.4   | 18.4 | -9.9  | -1.5  | 10.3 | -13.5 |
| S22035        | 3.8   | 16.0 | -11.7 | 5.2   | 18.2 | -12.3 | -1.2  | 10.3 | -14.8 |
| S23002        | 3.9   | 17.0 | -12.2 | 2.8   | 19.7 | -10.0 | 0.8   | 11.0 | -11.7 |
| S24008        | 8.1   | 27.8 | -13.7 | 5.1   | 31.4 | -11.8 | 4.5   | 20.3 | -11.0 |
| S24030        | 8.0   | 26.7 | -13.0 | 5.4   | 29.9 | -11.3 | 5.1   | 20.7 | -10.0 |
| S25002        | 9.9   | 24.1 | -9.3  | 4.9   | 25.9 | -3.7  | 3.1   | 23.4 | -9.4  |
| S25006        | 12.3  | 27.4 | -15.7 | 9.1   | 27.4 | -5.9  | 2.8   | 35.6 | -8.9  |
| S25030        | 8.5   | 27.9 | -8.7  | 4.0   | 30.7 | -3.0  | 3.0   | 27.8 | -4.7  |
| S25034        | 4.2   | 20.8 | -12.2 | 8.4   | 23.4 | -11.8 | 5.7   | 28.4 | -12.6 |
| S26021        | 3.9   | 20.0 | -12.8 | 7.3   | 22.1 | -12.1 | 4.2   | 26.2 | -13.6 |
| S26058        | 1.7   | 18.2 | -13.0 | 5.4   | 21.6 | -12.0 | 3.8   | 25.2 | -14.1 |
| S27002        | 10.4  | 33.5 | -9.6  | 5.7   | 37.0 | -1.6  | 5.2   | 35.4 | -2.2  |
| S30007        | 9.1   | 20.4 | -8.2  | 6.5   | 24.2 | -2.0  | 7.4   | 23.3 | -2.3  |
| S32012        | 5.4   | 22.4 | -2.4  | 5.8   | 29.9 | -3.8  | 6.4   | 31.0 | -0.8  |
| S33001        | 5.6   | 27.0 | -3.3  | 5.8   | 34.4 | -5.3  | 6.2   | 35.1 | -2.3  |
| S34001        | 8.1   | 28.3 | -3.7  | 7.5   | 33.4 | 2.1   | 9.3   | 36.1 | 2.1   |
| S35002        | 6.5   | 25.0 | -3.1  | 5.6   | 29.9 | 1.6   | 8.2   | 31.9 | 1.2   |
| S35005        | 4.2   | 16.6 | -6.8  | 6.2   | 19.4 | -5.2  | 6.5   | 18.4 | -6.4  |
| S36015        | 6.2   | 19.9 | -6.8  | 8.3   | 23.4 | -4.8  | 12.3  | 24.2 | -4.3  |
| S36019        | 10.0  | 28.7 | -7.4  | 12.5  | 34.3 | -4.8  | 13.2  | 37.4 | -1.3  |
| S38001        | 3.7   | 12.0 | -2.6  | 5.1   | 15.8 | 0.3   | 6.9   | 21.0 | 0.6   |
| S39009        | 3.0   | 25.8 | -2.8  | 5.4   | 32.6 | -4.6  | 7.8   | 34.2 | -1.7  |

**Table S4 Median and 90 percent confidence interval of projected changes (percent) in annual Q95 low flows for each catchment using the SMART hydrological model for each future time period and SSP.**

| Catchment | 2020s |      |       | SSP126<br>2050s |      |       | 2080s  |      |       |
|-----------|-------|------|-------|-----------------|------|-------|--------|------|-------|
|           | med   | upp  | low   | median          | upp  | low   | median | upp  | low   |
| S06013    | -7.6  | 31.7 | -16.9 | -2.5            | 23.6 | -15.5 | 0.3    | 26.4 | -16.4 |
| S06014    | -7.0  | 33.1 | -17.0 | -3.6            | 26.2 | -16.7 | 0.6    | 26.8 | -16.2 |
| S07009    | -6.1  | 13.9 | -19.5 | -6.4            | 3.8  | -27.8 | -6.2   | 5.0  | -24.2 |
| S07012    | -7.0  | 14.0 | -20.1 | -5.3            | 4.3  | -28.8 | -6.0   | 5.6  | -24.3 |
| S12001    | -7.7  | 26.2 | -15.0 | -4.1            | 14.1 | -21.3 | -3.3   | 14.4 | -19.0 |
| S14007    | -6.3  | 13.4 | -19.7 | -6.2            | 3.4  | -28.0 | -5.5   | 5.3  | -24.1 |
| S15003    | -7.4  | 31.0 | -20.0 | -9.2            | 21.4 | -28.0 | -6.8   | 13.9 | -23.7 |
| S15006    | -3.9  | 35.8 | -17.2 | -4.7            | 26.6 | -23.4 | -4.6   | 27.2 | -20.5 |
| S15007    | -5.1  | 37.9 | -20.5 | -10.2           | 32.4 | -21.3 | -8.2   | 32.2 | -19.1 |
| S16008    | -5.8  | 19.7 | -19.0 | -8.2            | 11.3 | -19.9 | -7.6   | 2.4  | -18.6 |
| S16011    | -5.8  | 13.0 | -13.7 | -4.3            | 5.8  | -14.3 | -5.6   | 2.1  | -13.8 |
| S18002    | -4.1  | 18.4 | -13.7 | -4.3            | 10.3 | -22.5 | -7.2   | 8.7  | -21.2 |
| S18003    | -4.0  | 18.7 | -16.1 | -6.4            | 11.6 | -24.3 | -7.9   | 8.6  | -22.8 |
| S18006    | -4.4  | 16.1 | -14.8 | -5.9            | 8.4  | -22.7 | -7.8   | 5.9  | -21.7 |
| S18050    | -5.7  | 12.1 | -15.5 | -9.2            | 7.9  | -24.0 | -10.4  | 7.1  | -24.0 |
| S22006    | -4.5  | 11.5 | -13.9 | -7.7            | 8.4  | -21.1 | -9.1   | 6.9  | -20.2 |
| S22035    | -3.5  | 12.0 | -15.2 | -9.3            | 11.5 | -20.3 | -9.4   | 10.0 | -18.7 |
| S23002    | -7.1  | 19.2 | -16.3 | -9.7            | 15.4 | -24.8 | -8.7   | 9.2  | -24.8 |
| S24008    | -6.1  | 24.5 | -13.8 | -2.9            | 14.6 | -22.7 | -2.3   | 11.8 | -21.8 |
| S24030    | -5.8  | 24.3 | -14.6 | -4.0            | 14.6 | -24.3 | -3.6   | 11.3 | -22.9 |
| S25002    | -3.8  | 28.1 | -16.8 | -7.6            | 24.2 | -16.0 | -4.9   | 24.5 | -15.1 |
| S25006    | -1.1  | 11.1 | -11.4 | -2.6            | 3.9  | -14.4 | -3.0   | 10.1 | -14.2 |
| S25030    | -1.8  | 38.7 | -14.9 | -5.3            | 40.5 | -15.7 | -2.5   | 34.1 | -14.5 |
| S25034    | -1.9  | 19.1 | -17.7 | -3.9            | 8.1  | -27.6 | -6.6   | 15.3 | -23.2 |
| S26021    | -2.2  | 14.7 | -17.8 | -5.4            | 6.7  | -27.3 | -7.7   | 14.8 | -23.3 |
| S26058    | -8.7  | 13.2 | -17.9 | -7.4            | 3.6  | -28.4 | -8.0   | 4.7  | -24.0 |
| S27002    | -4.8  | 47.8 | -19.1 | -5.8            | 55.2 | -20.0 | -2.7   | 44.6 | -19.7 |
| S30007    | -5.3  | 18.0 | -13.1 | -1.8            | 10.9 | -15.0 | -1.8   | 7.7  | -18.7 |
| S32012    | -2.7  | 10.0 | -13.8 | -8.1            | 9.5  | -22.1 | -3.6   | 9.3  | -19.8 |
| S33001    | -3.5  | 10.4 | -14.5 | -4.3            | 5.8  | -20.3 | -3.8   | 10.6 | -20.8 |
| S34001    | -3.1  | 19.9 | -14.8 | -1.8            | 22.5 | -14.4 | 2.6    | 15.7 | -17.7 |
| S35002    | -1.6  | 9.9  | -12.9 | -5.4            | 7.4  | -14.3 | -1.9   | 8.7  | -16.1 |
| S35005    | -4.0  | 11.3 | -15.3 | -7.3            | 7.6  | -17.0 | -2.1   | 7.2  | -17.2 |
| S36015    | -4.0  | 15.4 | -16.6 | -7.3            | 8.2  | -18.8 | -4.5   | 9.8  | -19.7 |
| S36019    | -5.1  | 22.8 | -17.7 | -7.4            | 14.5 | -19.4 | 0.8    | 12.0 | -21.3 |
| S38001    | -5.1  | 1.7  | -15.6 | -8.1            | 1.5  | -16.7 | -4.7   | 3.1  | -21.4 |
| S39009    | -3.7  | 5.1  | -18.5 | -5.0            | 6.3  | -25.5 | -2.8   | 13.9 | -26.5 |

| Catchment | SSP370 |      |       |        |      |       |        |       |       |
|-----------|--------|------|-------|--------|------|-------|--------|-------|-------|
|           | 2020s  |      |       | 2050s  |      |       | 2080s  |       |       |
|           | med    | upp  | low   | median | upp  | low   | median | upp   | low   |
| S06013    | -3.0   | 20.6 | -17.5 | -8.9   | 22.6 | -18.9 | -14.7  | 3.2   | -30.4 |
| S06014    | -2.6   | 22.2 | -17.4 | -9.1   | 23.8 | -19.2 | -15.6  | 2.7   | -30.8 |
| S07009    | -5.5   | 8.7  | -20.4 | -11.3  | 0.9  | -28.2 | -21.7  | -10.1 | -37.3 |
| S07012    | -6.2   | 10.2 | -21.2 | -11.1  | 1.4  | -27.7 | -22.1  | -8.5  | -39.0 |
| S12001    | -5.1   | 15.7 | -19.5 | -8.8   | 9.9  | -23.8 | -17.0  | -4.4  | -30.1 |
| S14007    | -7.1   | 7.6  | -20.4 | -6.6   | 2.4  | -31.6 | -21.4  | -7.8  | -35.2 |
| S15003    | -7.7   | 19.5 | -22.4 | -15.3  | 15.5 | -31.3 | -24.0  | -7.0  | -39.9 |
| S15006    | -5.7   | 30.2 | -20.2 | -10.0  | 20.5 | -26.6 | -17.7  | 1.6   | -33.2 |
| S15007    | -3.5   | 30.7 | -18.4 | -14.8  | 27.0 | -29.8 | -23.2  | 0.1   | -36.7 |
| S16008    | -2.9   | 13.0 | -17.8 | -13.2  | 8.1  | -28.2 | -24.5  | -9.3  | -33.9 |
| S16011    | -1.2   | 9.8  | -13.7 | -9.6   | 4.0  | -18.9 | -17.9  | -7.1  | -24.3 |
| S18002    | -5.5   | 21.1 | -18.8 | -11.9  | 12.5 | -25.3 | -17.9  | -7.5  | -31.2 |
| S18003    | -5.9   | 20.3 | -20.1 | -14.3  | 11.5 | -27.7 | -20.8  | -8.1  | -34.7 |
| S18006    | -5.9   | 16.8 | -18.4 | -13.8  | 8.7  | -25.8 | -20.3  | -9.7  | -32.7 |
| S18050    | -7.7   | 13.6 | -19.1 | -18.3  | 7.3  | -27.3 | -24.8  | -12.9 | -37.7 |
| S22006    | -4.6   | 12.3 | -17.5 | -16.1  | 8.3  | -23.7 | -22.7  | -11.1 | -34.5 |
| S22035    | -5.2   | 12.0 | -20.1 | -14.1  | 8.8  | -26.0 | -24.7  | -13.4 | -36.8 |
| S23002    | -5.2   | 13.2 | -20.5 | -19.6  | 10.2 | -28.6 | -27.5  | -9.2  | -40.2 |
| S24008    | -1.7   | 21.2 | -19.2 | -10.6  | 15.5 | -24.5 | -17.4  | -3.1  | -31.2 |
| S24030    | -1.6   | 19.7 | -20.1 | -10.1  | 15.0 | -27.0 | -17.9  | -3.4  | -33.2 |
| S25002    | -2.9   | 20.9 | -15.0 | -14.4  | 19.9 | -23.3 | -23.1  | -2.1  | -32.2 |
| S25006    | -1.1   | 8.0  | -14.2 | -5.9   | -0.2 | -16.7 | -15.0  | -8.6  | -25.7 |
| S25030    | 1.0    | 32.9 | -14.7 | -14.0  | 34.3 | -27.5 | -23.6  | 10.4  | -33.4 |
| S25034    | -4.1   | 12.7 | -21.8 | -8.4   | 3.0  | -28.1 | -20.6  | -6.4  | -37.6 |
| S26021    | -4.4   | 10.8 | -21.4 | -9.8   | 0.5  | -27.1 | -21.7  | -8.3  | -37.7 |
| S26058    | -7.5   | 10.1 | -22.5 | -11.7  | 0.6  | -29.7 | -21.7  | -9.7  | -38.4 |
| S27002    | -2.0   | 42.0 | -17.5 | -17.7  | 46.3 | -29.4 | -27.6  | 13.0  | -38.7 |
| S30007    | -1.7   | 13.0 | -17.4 | -11.0  | 8.8  | -22.6 | -18.6  | -6.1  | -31.0 |
| S32012    | -3.4   | 6.1  | -16.6 | -13.8  | 3.1  | -23.9 | -22.3  | -9.7  | -34.4 |
| S33001    | -4.2   | 7.9  | -11.8 | -12.3  | 4.6  | -21.7 | -20.0  | -6.7  | -31.8 |
| S34001    | -3.2   | 16.0 | -15.0 | -9.5   | 13.4 | -24.4 | -21.6  | -1.2  | -33.7 |
| S35002    | -5.5   | 7.2  | -12.5 | -12.5  | 1.6  | -21.6 | -19.9  | -6.6  | -28.9 |
| S35005    | -4.5   | 5.0  | -16.1 | -14.0  | 1.6  | -21.4 | -20.8  | -12.1 | -32.5 |
| S36015    | -5.5   | 8.5  | -18.8 | -14.5  | 2.4  | -25.3 | -23.6  | -9.3  | -36.9 |
| S36019    | -3.7   | 13.5 | -21.5 | -12.0  | 11.4 | -25.2 | -24.6  | -11.7 | -37.3 |
| S38001    | -7.0   | 2.7  | -16.7 | -12.7  | -5.7 | -22.6 | -22.6  | -14.9 | -30.8 |
| S39009    | -5.5   | 10.8 | -16.9 | -14.1  | 6.7  | -29.6 | -20.4  | -8.4  | -38.3 |

| Catchment | SSP585 |      |       |        |      |       |        |       |       |
|-----------|--------|------|-------|--------|------|-------|--------|-------|-------|
|           | 2020s  |      |       | 2050s  |      |       | 2080s  |       |       |
|           | med    | upp  | low   | median | upp  | low   | median | upp   | low   |
| S06013    | -1.8   | 26.6 | -15.6 | -15.6  | 9.4  | -22.8 | -23.5  | 5.0   | -34.4 |
| S06014    | -2.3   | 29.0 | -16.9 | -17.2  | 9.8  | -23.1 | -26.2  | 4.9   | -35.0 |
| S07009    | -4.3   | 12.3 | -21.5 | -20.5  | -6.2 | -30.6 | -27.5  | -13.5 | -44.7 |
| S07012    | -4.1   | 13.2 | -22.1 | -20.6  | -5.9 | -30.9 | -27.7  | -13.3 | -45.1 |
| S12001    | -3.0   | 17.8 | -17.4 | -13.8  | 5.9  | -25.9 | -20.5  | -1.5  | -36.6 |
| S14007    | -5.8   | 9.5  | -21.2 | -18.6  | -5.0 | -31.5 | -25.3  | -13.8 | -42.8 |
| S15003    | -6.3   | 22.3 | -21.5 | -21.5  | 3.5  | -35.1 | -28.8  | -1.9  | -44.2 |
| S15006    | -4.7   | 26.8 | -17.9 | -15.9  | 11.4 | -29.9 | -24.7  | 4.8   | -38.2 |
| S15007    | -4.3   | 31.9 | -21.6 | -22.0  | 12.8 | -33.2 | -30.0  | 4.6   | -42.8 |
| S16008    | -3.0   | 12.8 | -19.6 | -20.7  | -5.8 | -30.7 | -28.1  | -13.6 | -39.4 |
| S16011    | -1.0   | 8.1  | -12.3 | -13.2  | -3.7 | -21.1 | -19.3  | -9.2  | -28.4 |
| S18002    | -3.2   | 14.8 | -17.1 | -15.4  | 2.5  | -28.9 | -21.8  | -9.0  | -38.5 |
| S18003    | -5.1   | 13.8 | -18.8 | -18.9  | 1.7  | -31.9 | -24.8  | -12.4 | -41.8 |
| S18006    | -5.0   | 11.3 | -18.1 | -17.5  | 0.2  | -30.0 | -24.1  | -12.9 | -39.8 |
| S18050    | -7.4   | 10.5 | -19.9 | -20.1  | -1.8 | -33.7 | -29.8  | -14.6 | -44.4 |
| S22006    | -5.6   | 10.2 | -17.8 | -17.6  | -0.7 | -30.8 | -26.2  | -12.1 | -41.4 |
| S22035    | -6.3   | 11.0 | -19.6 | -17.8  | -1.1 | -33.8 | -27.3  | -11.7 | -43.3 |
| S23002    | -8.4   | 13.6 | -21.2 | -21.0  | 1.4  | -36.0 | -30.1  | -11.9 | -47.3 |
| S24008    | -2.4   | 17.8 | -18.2 | -14.0  | 5.0  | -28.6 | -20.9  | -2.5  | -38.2 |
| S24030    | -2.6   | 17.7 | -19.5 | -16.0  | 3.5  | -30.5 | -21.4  | -4.0  | -40.0 |
| S25002    | -0.9   | 24.0 | -18.9 | -19.3  | 11.9 | -29.8 | -24.6  | 1.7   | -39.8 |
| S25006    | -0.8   | 7.7  | -11.3 | -13.5  | -4.0 | -21.6 | -19.4  | -10.3 | -30.8 |
| S25030    | 0.5    | 37.2 | -19.9 | -18.4  | 26.5 | -29.8 | -27.2  | 12.9  | -39.0 |
| S25034    | -4.2   | 15.3 | -20.2 | -18.8  | -3.9 | -29.9 | -25.3  | -11.2 | -43.8 |
| S26021    | -5.4   | 12.5 | -20.3 | -19.4  | -6.3 | -30.2 | -25.5  | -13.8 | -43.8 |
| S26058    | -8.1   | 13.5 | -21.3 | -22.3  | -6.9 | -30.2 | -27.5  | -14.9 | -44.3 |
| S27002    | -0.8   | 46.4 | -22.9 | -22.6  | 25.0 | -33.9 | -30.2  | 14.4  | -43.2 |
| S30007    | -3.6   | 16.6 | -16.5 | -19.3  | -1.5 | -24.1 | -22.2  | -8.6  | -35.2 |
| S32012    | -3.5   | 11.5 | -21.3 | -16.8  | 1.8  | -30.7 | -28.6  | -10.0 | -40.6 |
| S33001    | -3.0   | 12.8 | -15.5 | -12.8  | 0.3  | -27.3 | -25.6  | -7.8  | -36.9 |
| S34001    | -1.3   | 24.4 | -18.7 | -14.2  | 5.3  | -28.9 | -26.8  | -3.9  | -34.4 |
| S35002    | -2.7   | 11.4 | -17.6 | -14.7  | 1.0  | -26.1 | -25.0  | -7.7  | -33.5 |
| S35005    | -2.4   | 8.5  | -18.9 | -18.7  | -2.9 | -27.8 | -25.9  | -11.3 | -35.7 |
| S36015    | -1.7   | 12.4 | -21.4 | -20.9  | -2.7 | -30.7 | -27.6  | -9.2  | -40.4 |
| S36019    | -4.8   | 18.3 | -18.4 | -22.0  | -7.0 | -29.4 | -31.3  | -12.6 | -39.7 |
| S38001    | -5.3   | 4.6  | -20.4 | -17.5  | -6.0 | -30.7 | -25.7  | -15.4 | -38.1 |
| S39009    | -6.5   | 10.4 | -17.9 | -14.8  | 1.0  | -35.1 | -29.4  | -8.9  | -45.6 |

**Table S5 Median and 90 percent confidence interval of projected changes (percent) in annual Q95 low flows for each catchment using the GR4J hydrological model for each future time period and SSP.**

| Catchment | SSP126 |      |       |       |      |       |       |      |       |
|-----------|--------|------|-------|-------|------|-------|-------|------|-------|
|           | 2020s  |      |       | 2050s |      |       | 2080s |      |       |
|           | med    | upp  | low   | med   | upp  | low   | med   | upp  | low   |
| S06013    | -4.0   | 15.7 | -12.0 | -3.5  | 21.3 | -12.4 | 2.5   | 22.3 | -13.1 |
| S06014    | -3.7   | 15.2 | -12.3 | -3.5  | 20.9 | -13.0 | 2.2   | 22.3 | -13.6 |
| S07009    | -4.2   | 7.2  | -9.0  | -4.6  | 8.5  | -15.5 | -0.3  | 8.3  | -13.0 |
| S07012    | -4.2   | 7.0  | -9.3  | -4.7  | 8.3  | -16.1 | -0.4  | 8.2  | -13.4 |
| S12001    | -8.1   | 36.9 | -28.5 | -10.4 | 37.4 | -31.7 | -5.1  | 33.4 | -21.1 |
| S14007    | -4.5   | 10.5 | -7.7  | -3.8  | 9.3  | -14.2 | -1.9  | 8.8  | -11.6 |
| S15003    | -3.7   | 20.6 | -16.8 | -5.0  | 22.2 | -18.5 | -2.5  | 19.6 | -11.7 |
| S15006    | -3.1   | 23.2 | -15.8 | -5.0  | 28.5 | -17.6 | -3.3  | 27.5 | -11.2 |
| S15007    | -4.5   | 15.6 | -21.5 | -6.1  | 26.4 | -25.0 | 3.7   | 30.0 | -29.4 |
| S16008    | 0.2    | 18.4 | -23.3 | -8.4  | 16.1 | -22.7 | -6.0  | 10.9 | -12.4 |
| S16011    | -1.8   | 16.5 | -23.8 | -9.1  | 14.7 | -23.4 | -4.6  | 10.6 | -12.3 |
| S18002    | -0.8   | 13.8 | -14.6 | -8.4  | 13.4 | -18.2 | -5.0  | 15.1 | -14.8 |
| S18003    | -1.1   | 13.5 | -14.8 | -8.3  | 13.3 | -18.6 | -5.0  | 14.9 | -14.7 |
| S18006    | -1.3   | 13.2 | -15.0 | -8.5  | 13.0 | -18.9 | -5.0  | 14.9 | -14.8 |
| S18050    | -3.4   | 8.3  | -16.7 | -10.2 | 10.9 | -23.8 | -5.1  | 13.6 | -16.5 |
| S22006    | -5.2   | 5.0  | -17.9 | -11.4 | 4.6  | -26.1 | -4.6  | 8.5  | -21.4 |
| S22035    | -5.3   | 4.5  | -18.1 | -8.3  | 4.6  | -25.5 | -4.3  | 8.7  | -21.3 |
| S23002    | -3.8   | 12.9 | -16.8 | -11.1 | 14.8 | -23.9 | -4.4  | 14.7 | -16.2 |
| S24008    | -1.6   | 20.6 | -13.1 | -6.3  | 21.6 | -15.5 | 0.7   | 15.0 | -13.6 |
| S24030    | -1.0   | 20.9 | -12.7 | -4.8  | 22.6 | -14.9 | 0.6   | 15.6 | -13.0 |
| S25002    | -2.9   | 27.5 | -31.6 | -7.2  | 37.4 | -34.7 | -4.7  | 47.5 | -19.5 |
| S25006    | -0.1   | 11.8 | -12.5 | -6.3  | 13.3 | -19.9 | -1.9  | 21.0 | -19.5 |
| S25030    | -1.4   | 26.0 | -15.8 | -3.5  | 34.2 | -17.3 | 0.0   | 32.7 | -11.5 |
| S25034    | -2.7   | 8.0  | -8.5  | -4.9  | 10.9 | -16.9 | -1.6  | 13.7 | -13.9 |
| S26021    | -2.0   | 6.4  | -9.3  | -5.7  | 8.8  | -17.5 | -2.9  | 14.3 | -14.2 |
| S26058    | -6.1   | 6.2  | -12.6 | -7.3  | 7.8  | -18.2 | -4.6  | 8.0  | -17.5 |
| S27002    | -3.0   | 44.3 | -28.8 | -7.7  | 61.9 | -32.5 | -4.3  | 58.5 | -22.5 |
| S30007    | -2.1   | 8.0  | -9.1  | -3.2  | 13.0 | -14.6 | 2.5   | 10.0 | -14.8 |
| S32012    | -4.0   | 5.2  | -11.9 | -4.6  | 8.6  | -19.8 | -2.1  | 9.6  | -17.2 |
| S33001    | -4.3   | 3.7  | -11.9 | -4.4  | 6.7  | -19.2 | -1.3  | 8.3  | -17.3 |
| S34001    | -1.8   | 8.4  | -11.0 | -2.8  | 15.0 | -16.7 | 1.7   | 13.6 | -16.3 |
| S35002    | -3.6   | 4.1  | -10.8 | -5.7  | 8.0  | -19.6 | -0.5  | 9.4  | -17.1 |
| S35005    | -0.8   | 9.9  | -15.0 | -5.5  | 13.9 | -19.3 | -2.1  | 17.7 | -17.4 |
| S36015    | -3.9   | 9.0  | -13.6 | -5.0  | 14.0 | -16.6 | -0.8  | 16.2 | -17.0 |
| S36019    | -4.5   | 15.6 | -21.5 | -6.1  | 26.4 | -25.0 | 3.7   | 30.0 | -29.4 |
| S38001    | -7.7   | 1.6  | -13.5 | -9.0  | 2.5  | -18.9 | -2.2  | 2.5  | -19.0 |
| S39009    | -3.5   | 4.0  | -16.1 | -3.8  | 9.4  | -21.2 | 0.2   | 15.8 | -20.0 |

| Catchment | SSP370 |      |       |       |      |       |       |       |       |
|-----------|--------|------|-------|-------|------|-------|-------|-------|-------|
|           | 2020s  |      |       | 2050s |      |       | 2080s |       |       |
|           | med    | upp  | low   | med   | upp  | low   | med   | upp   | low   |
| S06013    | -5.3   | 13.1 | -9.2  | -8.5  | 13.0 | -15.6 | -11.2 | 0.8   | -19.4 |
| S06014    | -5.4   | 12.5 | -9.5  | -8.8  | 12.2 | -16.3 | -12.3 | -0.1  | -20.2 |
| S07009    | -6.2   | 4.4  | -11.6 | -12.4 | 2.4  | -17.0 | -19.0 | -6.1  | -24.2 |
| S07012    | -6.5   | 4.0  | -12.0 | -13.0 | 2.1  | -17.5 | -19.4 | -6.4  | -24.8 |
| S12001    | -11.6  | 24.1 | -23.8 | -24.7 | 20.8 | -37.3 | -34.7 | -6.3  | -49.2 |
| S14007    | -5.2   | 6.0  | -12.1 | -10.2 | 3.8  | -17.0 | -17.8 | -4.3  | -24.6 |
| S15003    | -4.6   | 13.3 | -12.6 | -13.2 | 11.3 | -23.9 | -19.8 | -3.3  | -28.7 |
| S15006    | -3.5   | 19.9 | -12.1 | -12.9 | 19.3 | -22.6 | -18.0 | 1.9   | -27.4 |
| S15007    | -9.4   | 12.6 | -18.2 | -13.8 | 9.1  | -32.4 | -22.2 | -8.2  | -37.1 |
| S16008    | -7.2   | 11.2 | -15.8 | -13.4 | 10.4 | -32.7 | -27.6 | -9.9  | -38.4 |
| S16011    | -7.0   | 8.0  | -16.4 | -15.3 | 8.6  | -33.3 | -28.5 | -10.2 | -41.4 |
| S18002    | -3.1   | 6.4  | -12.4 | -11.3 | 11.8 | -22.9 | -21.4 | -9.9  | -28.0 |
| S18003    | -4.9   | 6.0  | -12.7 | -11.7 | 11.2 | -23.4 | -22.6 | -10.4 | -28.5 |
| S18006    | -5.2   | 5.7  | -12.8 | -12.0 | 10.7 | -23.7 | -22.9 | -10.7 | -28.9 |
| S18050    | -6.4   | 3.9  | -13.5 | -14.8 | 5.9  | -28.7 | -26.5 | -13.0 | -32.1 |
| S22006    | -6.9   | 1.0  | -15.8 | -17.7 | -0.8 | -30.5 | -30.0 | -16.3 | -36.0 |
| S22035    | -6.8   | 1.4  | -16.9 | -14.9 | -0.9 | -30.6 | -30.0 | -16.7 | -37.8 |
| S23002    | -5.8   | 5.1  | -13.1 | -15.1 | 4.8  | -28.6 | -26.7 | -9.9  | -32.1 |
| S24008    | -1.8   | 13.4 | -11.7 | -10.3 | 14.1 | -20.2 | -19.4 | -2.4  | -24.8 |
| S24030    | -1.1   | 14.4 | -11.1 | -9.7  | 15.4 | -19.6 | -18.1 | -1.3  | -24.0 |
| S25002    | -4.4   | 22.0 | -24.4 | -21.0 | 27.1 | -43.3 | -36.2 | -7.8  | -53.0 |
| S25006    | -7.3   | 10.3 | -14.1 | -14.8 | 1.4  | -26.9 | -27.8 | -12.0 | -34.7 |
| S25030    | -1.0   | 20.8 | -11.1 | -11.3 | 21.9 | -24.7 | -20.4 | 3.7   | -28.5 |
| S25034    | -4.5   | 5.8  | -12.3 | -11.1 | 3.1  | -19.2 | -18.8 | -5.6  | -25.9 |
| S26021    | -4.8   | 3.8  | -12.9 | -12.1 | 1.2  | -19.8 | -19.7 | -7.1  | -26.2 |
| S26058    | -7.3   | 3.4  | -16.3 | -14.1 | 1.2  | -20.3 | -20.8 | -7.0  | -28.5 |
| S27002    | -2.4   | 35.6 | -19.4 | -18.5 | 38.4 | -43.3 | -35.5 | 4.7   | -48.5 |
| S30007    | -4.9   | 5.8  | -10.9 | -11.0 | 3.5  | -22.7 | -19.2 | -7.0  | -25.5 |
| S32012    | -4.4   | 1.6  | -11.6 | -11.9 | -1.3 | -23.8 | -20.0 | -9.6  | -29.9 |
| S33001    | -4.3   | 1.2  | -9.7  | -11.7 | 3.8  | -23.1 | -19.2 | -8.0  | -29.5 |
| S34001    | -1.7   | 3.9  | -10.7 | -9.1  | 2.5  | -23.4 | -16.0 | -7.1  | -27.7 |
| S35002    | -5.8   | 1.9  | -12.2 | -12.8 | -1.7 | -26.8 | -19.6 | -9.1  | -30.5 |
| S35005    | -7.1   | 4.1  | -13.4 | -12.2 | 0.0  | -24.2 | -20.5 | -7.5  | -27.4 |
| S36015    | -7.4   | 6.9  | -12.4 | -12.4 | -0.3 | -22.5 | -18.6 | -6.7  | -24.6 |
| S36019    | -9.4   | 12.6 | -18.2 | -13.8 | 9.1  | -32.4 | -22.2 | -8.2  | -37.1 |
| S38001    | -7.6   | -0.8 | -14.0 | -13.2 | -6.5 | -22.6 | -23.7 | -12.6 | -29.9 |
| S39009    | -4.1   | 4.4  | -12.5 | -12.1 | 7.5  | -25.2 | -17.5 | -7.0  | -29.5 |

| Catchment | SSP585 |      |       |       |       |       |       |       |       |
|-----------|--------|------|-------|-------|-------|-------|-------|-------|-------|
|           | 2020s  |      |       | 2050s |       |       | 2080s |       |       |
|           | med    | upp  | low   | med   | upp   | low   | med   | upp   | low   |
| S06013    | -4.0   | 12.7 | -11.6 | -11.0 | 6.1   | -19.7 | -16.6 | 1.3   | -23.5 |
| S06014    | -4.2   | 12.3 | -11.8 | -11.8 | 5.7   | -20.6 | -17.3 | 0.9   | -24.5 |
| S07009    | -7.1   | 8.2  | -14.7 | -14.8 | -2.4  | -21.6 | -19.0 | -9.1  | -27.3 |
| S07012    | -7.0   | 8.2  | -15.1 | -15.1 | -2.8  | -22.3 | -19.8 | -9.7  | -28.0 |
| S12001    | -11.7  | 25.3 | -27.4 | -29.0 | 9.6   | -43.9 | -37.3 | -2.7  | -56.0 |
| S14007    | -5.0   | 8.7  | -13.8 | -13.7 | -1.3  | -20.2 | -16.6 | -7.7  | -25.2 |
| S15003    | -5.2   | 13.4 | -16.0 | -17.2 | 6.2   | -25.4 | -21.0 | -0.2  | -32.3 |
| S15006    | -4.1   | 18.7 | -15.6 | -16.3 | 9.4   | -23.9 | -20.0 | 4.2   | -30.7 |
| S15007    | -7.0   | 12.9 | -23.2 | -24.0 | 2.0   | -38.1 | -31.5 | -4.3  | -41.9 |
| S16008    | -2.6   | 12.3 | -21.7 | -19.2 | -4.9  | -34.8 | -31.6 | -14.0 | -45.3 |
| S16011    | -2.4   | 12.7 | -23.7 | -21.8 | -4.4  | -38.0 | -35.3 | -15.6 | -48.6 |
| S18002    | -7.2   | 7.7  | -15.6 | -19.7 | 1.1   | -25.4 | -21.8 | -6.1  | -33.8 |
| S18003    | -7.2   | 7.5  | -16.3 | -19.9 | 0.6   | -26.1 | -22.9 | -6.7  | -34.6 |
| S18006    | -7.4   | 7.4  | -16.5 | -20.0 | 0.1   | -26.5 | -23.2 | -7.1  | -35.0 |
| S18050    | -8.6   | 5.9  | -18.1 | -21.2 | -3.7  | -30.4 | -26.5 | -9.2  | -39.0 |
| S22006    | -9.8   | 6.0  | -20.2 | -22.6 | -11.9 | -33.5 | -30.2 | -15.3 | -45.0 |
| S22035    | -10.9  | 4.6  | -20.7 | -21.1 | -12.0 | -35.3 | -29.5 | -15.3 | -47.0 |
| S23002    | -9.0   | 5.8  | -18.3 | -21.6 | 1.0   | -30.7 | -25.8 | -9.4  | -38.8 |
| S24008    | -5.5   | 13.0 | -13.1 | -17.7 | 3.0   | -21.8 | -19.5 | -3.6  | -29.8 |
| S24030    | -4.6   | 13.5 | -12.7 | -15.9 | 4.0   | -21.2 | -16.9 | -2.7  | -29.0 |
| S25002    | -7.2   | 23.9 | -36.7 | -31.5 | 18.7  | -50.1 | -41.4 | 2.6   | -61.1 |
| S25006    | -6.0   | 12.2 | -20.7 | -21.6 | -6.7  | -34.0 | -32.1 | -16.4 | -39.5 |
| S25030    | -2.2   | 22.0 | -18.7 | -17.7 | 15.9  | -26.9 | -24.2 | 7.7   | -33.8 |
| S25034    | -5.1   | 8.8  | -16.5 | -16.3 | -2.0  | -23.3 | -20.6 | -8.8  | -28.3 |
| S26021    | -5.2   | 7.9  | -17.2 | -16.9 | -3.5  | -23.9 | -21.8 | -10.9 | -29.0 |
| S26058    | -6.8   | 8.2  | -17.5 | -17.5 | -3.5  | -24.8 | -22.4 | -11.3 | -30.0 |
| S27002    | -3.3   | 36.7 | -32.8 | -28.6 | 29.8  | -45.9 | -37.7 | 14.1  | -56.9 |
| S30007    | -3.3   | 8.9  | -16.0 | -15.7 | -1.3  | -25.5 | -24.2 | -8.9  | -27.9 |
| S32012    | -4.2   | 3.7  | -17.0 | -16.8 | 0.7   | -27.3 | -24.4 | -8.1  | -35.9 |
| S33001    | -4.5   | 9.4  | -15.6 | -16.0 | -0.9  | -26.6 | -22.7 | -7.3  | -34.9 |
| S34001    | -1.0   | 7.3  | -16.5 | -13.6 | 2.7   | -27.2 | -20.8 | -7.1  | -29.6 |
| S35002    | -3.3   | 9.3  | -19.1 | -18.1 | 0.4   | -28.8 | -29.2 | -7.4  | -34.2 |
| S35005    | -5.7   | 6.7  | -19.8 | -17.8 | 0.5   | -27.2 | -24.0 | -5.9  | -32.1 |
| S36015    | -4.2   | 9.3  | -16.9 | -15.7 | 0.4   | -24.5 | -21.8 | -5.2  | -28.6 |
| S36019    | -7.0   | 12.9 | -23.2 | -24.0 | 2.0   | -38.1 | -31.5 | -4.3  | -41.9 |
| S38001    | -6.6   | 3.3  | -22.7 | -18.2 | -5.3  | -28.5 | -22.3 | -10.1 | -38.0 |
| S39009    | -6.0   | 5.9  | -14.3 | -15.5 | 1.4   | -28.7 | -21.9 | -0.5  | -36.7 |
